1 **Stereotypic expansion of T<sub>regulatory</sub> and Th<sub>17</sub> cells during infancy is disrupted**  
2 **by HIV exposure and gut epithelial damage.**

3

4 Sonwabile Dzanibe<sup>1\*</sup>, Katie Lennard<sup>2</sup>, Agano Kiravu<sup>1</sup>, Melanie S.S. Seabrook<sup>1,3</sup>, Berenice  
5 Alinde<sup>1</sup>, Susan P. Holmes<sup>4</sup>, Catherine A. Blish<sup>5,6</sup>, Heather B. Jaspan<sup>1,7</sup> and Clive M. Gray<sup>1,8\*</sup>

6

7 1. Division of Immunology, Institute of Infectious Diseases and Molecular Medicine,  
8 University of Cape Town, South Africa.

9 2. Division of Computational Biology, Institute of Infectious Diseases and Molecular  
10 Medicine, University of Cape Town, South Africa.

11 3. Department of Immunology, University of Toronto, Toronto, Canada

12 4. Department of Statistic, Stanford University, Stanford, CA USA

13 5. Department of Medicine, School of Medicine, Stanford University, Stanford, CA USA

14 6. Chan Zuckerberg Biohub, San Francisco, CA

15 7. Seattle Children's Research Institute and Departments of Paediatrics and Global Health,  
16 University of Washington, Seattle.

17 8. Division of Molecular Biology and Human Genetics, Stellenbosch University, Cape Town,  
18 South Africa.

19

20 Keywords: HIV-exposed uninfected infants, immune development, and intestinal damage

21

22 Count: Abstract: 134 words Text: 28685 characters

23

24 \*Corresponding authors:

25 Sonwabile Dzanibe

26 Email: [sonwabile.dzanibe@uct.ac.za](mailto:sonwabile.dzanibe@uct.ac.za)

27

28 Clive M. Gray

29 Email: [cgray@sun.ac.za](mailto:cgray@sun.ac.za)

30

31 Conflict of interest statement: The authors have declared that no conflict of interest exists.

32 **Summary**

33 Few studies have investigated immune cell ontogeny throughout the period of increased  
34 vulnerability to infections in early life. Here, we evaluated the dynamics of two critical T cell  
35 populations, regulatory T (Treg) cells and Th17 cells, over the first 9 months of life. We  
36 observed that Treg and Th17 cells developed in a synchronous fashion. Infants exposed to  
37 HIV *in utero* (iHEU), who are more likely to develop infections, had a lower frequency of  
38 Tregs at birth and 36 weeks compared to HIV unexposed infants. This increased Th17/Treg  
39 ratio in iHEU was associated with impaired gut integrity at birth. These findings suggest that  
40 gut damage disrupts the Th17/Treg ratio during infant immune development, likely by  
41 attracting Treg cells to regulate inflammation occurring in the gut, so revealing an immune-  
42 gut nexus influenced by HIV exposure.

43

## 44 **Introduction**

45 Early infancy has the highest risk of mortality in children under 5 years, and with over 45%  
46 of these deaths occurring in the first month of life (Liu *et al.*, 2016). Neonates are more likely  
47 to succumb to infections compared to adults, largely due to their cellular immune system  
48 being less effective at protecting against invading pathogens (Dowling and Levy, 2014).  
49 Although the foetal immune system has matured by 15 weeks' gestation, foetal immunity  
50 exhibits heightened tolerogenic activity, Th2/Th17 polarisation bias, and lacks antigen  
51 experience which can result in blunted cellular immunity to pathogenic insults in early  
52 perinatal life (Mold *et al.*, 2010; Kollmann *et al.*, 2012; Ivarsson *et al.*, 2013; Kraft *et al.*,  
53 2013). Following delivery, the neonatal immune system has to abruptly undergo adaptations  
54 to cope with extrauterine pathogens whilst developing tolerance to oral antigens and  
55 commensal microbes. Since postnatal immune interactions determine risk to subsequent  
56 infections and immune-related disease (Gensollen *et al.*, 2016; Torow and Hornef, 2017),  
57 understanding longitudinal ontogeny and factors that may disrupt development of the  
58 immune system are of critical importance in designing novel treatments and vaccine  
59 strategies to combat the high burden of disease in neonates.

60

61 CD4<sup>+</sup> helper T cells influence immunological responses to antigens either by promoting  
62 inflammation or establishing tolerance. T cell adaptive immunity among infants tends to  
63 exhibit weak Th1 polarization capacity (Kollmann *et al.*, 2012) and thus the homeostatic  
64 balance and interplay between Th17 and Treg cells during an inflammatory response is key to  
65 controlling infection while limiting immunopathology (Noack and Miossec, 2014). The  
66 ontogeny of these immune cells early in life is therefore crucial in establishing balanced  
67 immune responses towards pathogens, commensals and autoantigens. There are, however,  
68 limited studies reporting on the longitudinal development of Th17 and Treg cells, hence  
69 impeding potential corrective intervention strategies to ensure optimal protective immunity  
70 so being able to reduce the burden of infectious disease early in life.

71

72 There is a growing population of infants born to women living with HIV globally (Slogrove  
73 *et al.*, 2020), and although prenatal antiretroviral (ARV) treatment has reduced mother to  
74 child HIV transmission, HIV-exposed uninfected infants (iHEU) experience 60-70% higher  
75 mortality risk compared to their HIV-unexposed uninfected (iHUU) counterparts (Brennan *et al.*,  
76 2016). Infectious diseases are the most likely cause of iHEU mortality, owing to higher  
77 rates of gastrointestinal and respiratory tract infections compared to iHUU (Cohen *et al.*,  
78 2016; Slogrove *et al.*, 2016; Brennan *et al.*, 2019). It is possible that maternal HIV infection

79 can influence the Th17 and Treg immune balance in these children at birth and upset the  
80 trajectory of inflammatory versus tolerogenic immune cell ontogeny during early life. Thus,  
81 understanding the balance between immune inflammation and regulation in iHEU may also  
82 shed light on immune disturbances during infancy in general, and would also lay a foundation  
83 for providing more informed health-improving treatments for these vulnerable children.

84

85 Therefore, we aimed to define the ontogeny and relationship between Th17 and Treg cells in  
86 the first 9 months of life and examine how HIV/ARV exposure could impact the trajectory of  
87 these immune subsets. Here we show that the most dramatic change in the immune system  
88 occurs during the early period postpartum. Our data reveal that HIV/ARV exposure perturbs  
89 immune homeostatic and/or regulatory balance early in life, likely as a consequence of  
90 impaired epithelial gut integrity in iHEU compared to iHUU.

91

## 92 **Results**

### 93 *Stereotypic expansion of Th17 and Treg cells from birth to 36 weeks*

94 There is a paucity of data describing the ontogeny of Th17 and Treg cells throughout the first  
95 few months of life, with most studies comparing cord blood with infant and adult peripheral  
96 blood (Dirix, Vermeulen and Mascart, 2013; Collier *et al.*, 2015; Olin *et al.*, 2018). To  
97 describe the ontological changes occurring during infancy, we compared matched infant  
98 peripheral blood samples collected at birth, 7, 15 and 36 weeks of age from 16 healthy, term,  
99 breastfed infants. Thus, a total of sixty-four matching infant blood samples were analyzed by  
100 flow cytometry (FC) to determine the proportion of CD4<sup>+</sup>CCR6<sup>+</sup>CCR4<sup>+</sup>CD161<sup>+</sup>Th17 (Cosmi  
101 *et al.*, 2008) and CD4<sup>+</sup>CD25<sup>hi</sup>CD127<sup>+</sup>FoxP3<sup>+</sup> Treg cells reported as the percentage of CD4<sup>+</sup>  
102 cells (Table S1 and Figure S1). The proportions of Th17 cells were lowest at birth and  
103 gradually increased with age, peaking at 15 weeks (Figure 1A). Treg cells shared a similar  
104 stereotypic change as Th17 cells, being lowest at birth and increasing with age, although by 7  
105 weeks the levels stabilized, and a marginal decline was observed by 36 weeks (Figure 1B).  
106 The similar stereotypic changes of Th17 and Treg cells in the first 36 weeks of life was  
107 reflected in the significant correlation found between these two populations (Figure 1C).  
108 Knowing that Treg and Th17 cells exhibit high plasticity and in specific conditions have been  
109 shown to undergo trans-differentiation between the two CD4 subsets (Gagliani *et al.*, 2015;  
110 Sehrawat and Rouse, 2017), we examined whether the co-linearity of these cells was due to  
111 marker co-expression. Using uniform manifold approximation and projection (UMAP)  
112 analysis, Treg and Th17 markers were expressed on distinct subsets of cells (Figure 1D). Our  
113 data reveal that circulating Treg and Th17 cells show similar stereotypic changes during

114 infancy and that the parallel changes of Treg and Th17 cells are not due to a co-lineage of  
115 cells but are distinct populations.

116

117 *Cord blood and birth peripheral blood CD4 T cell populations are distinct.*

118 Cord blood is frequently used as a proxy for infant blood in early life studies of the immune  
119 system for logistical reasons. Since the proportions of Th17 and Treg cells were lower in cord  
120 blood compared to birth blood (Figure 1A & B), we determined the similarity between cord  
121 blood and infant peripheral blood collected at birth. We used a multicolor FC panel (Table  
122 S1) to analyze CD4<sup>+</sup> phenotypes, in a limited set of 6 matching cord blood samples and  
123 peripheral blood collected within the first 12 hours of life. First, we performed  
124 multidimensional scaling (MDS) on the expression intensities of the cell markers included in  
125 the FC panel. CD4<sup>+</sup> cells from cord blood uniquely clustered away from birth blood samples  
126 (Figure 1E). To determine which cell markers distinguished cord and birth blood CD4 cells,  
127 we used generalised linear mixed model (GLMM) regression that calculates log-odds  
128 expression to identify markers predictive of either blood type (Seiler *et al.*, 2021) This  
129 approach showed significantly increased odds of birth peripheral blood CD4<sup>+</sup> cells expressing  
130 CCR7, CCR4, CCR6 and CD25 compared to cord blood (Figure 1F). Conversely, cord blood  
131 CD4<sup>+</sup> cells had increased odds of expressing FoxP3 compared to birth blood (Figure 1F).  
132 These data show that there are phenotypic differences of CD4<sup>+</sup> T cells between cord blood  
133 and birth blood. Despite the limited sample size, this suggests that cord blood should not be  
134 equated with birth blood and that rapid changes in circulating T cells occur within hours of  
135 delivery.

136

137 *Identity of heterogenous CD4 clusters during infancy*

138 Treg and Th17 cells are not necessarily a defined static population and varying phenotypes  
139 have been described that play specific immunological roles (Bystrom *et al.*, 2019; Matos *et al.*,  
140 *et al.*, 2021). To further define the heterogeneity of inflammatory versus regulatory CD4 cells  
141 during infancy in an unbiased manner; we used unsupervised Flow Self-Organizing Maps  
142 (FlowSOM) and hierarchical clustering to identify unique CD4 clusters of cells. Using this  
143 approach, we identified 9 CD4<sup>+</sup> T cell clusters. Figures 2A & B show delineation of the  
144 CD4<sup>+</sup> populations by the expression of cell surface markers and cell cluster relatedness is  
145 displayed using hierarchal clustering dendrograms and UMAP mapping. We identified two  
146 clusters of Treg cells, a small population of CCR4<sup>+</sup> Tregs and relatively larger population of  
147  $\alpha 4\beta 7^+$  Tregs. The CCR4<sup>+</sup> Treg cluster co-expressed ectonucleotidase CD39, known to  
148 disrupt metabolic activity of activated and proliferating cells (Borsellino *et al.*, 2007), and the

149 inhibitory molecule, TIGIT, that prevents cognate interaction between antigen presenting  
150 cells and T helper cells (Joller *et al.*, 2014), suggesting that the CCR4<sup>+</sup> Treg cluster was a  
151 highly suppressive Treg population (Figure 2A). The 7-fold larger population of  $\alpha$ 4 $\beta$ 7<sup>+</sup> Tregs  
152 co-expressed CCR7<sup>+</sup>, characteristic of gut trafficking lymphocytes (Figure 2A). Both these  
153 cell clusters were distinct from the 7 other CD4<sup>+</sup> populations and showed a close relationship  
154 on the UMAP (Figure 2B). The trajectory and ontology of the FoxP3-expressing CD4  
155 clusters showed differing levels of expansion after birth (Figures 2C & D). These cells  
156 increased following birth and remained relatively stable at later time points although by 36  
157 weeks, the proportion of CCR4<sup>+</sup> Treg cluster decreased (Figure 2D). We also identified a  
158 Th17 cluster (CCR6<sup>+</sup>CCR4<sup>+</sup>CD161<sup>+</sup>) that increased with advancing infant age and a cluster  
159 denoted as Th1/17  $\alpha$ 4 $\beta$ 7<sup>+</sup> (CCR6<sup>+</sup>CCR4<sup>-</sup>CD161<sup>+</sup>) was identified that gradually increased with  
160 infant age and peaked at 15 weeks (Figure 2C & D).

161

162 In addition to the Treg and Th17 cell clusters, we also identified CD4<sup>+</sup> clusters that expanded  
163 following birth, including Th2 (CCR6<sup>-</sup>CCR4<sup>+</sup>), Treg-like  
164 (CD39<sup>+</sup>CD25<sup>+</sup>CCR6<sup>+</sup>TIGIT<sup>+</sup> $\alpha$ 4 $\beta$ 7<sup>+</sup>) and a miscellaneous cluster that did not express any of  
165 the markers analysed (Figure 2C and D). A naïve-like cluster accounting for >80% of the  
166 CD4 cells at birth, significantly reduced at later time points, presumably as the other antigen-  
167 experienced cells expanded (Figure 2C). A similar CD4<sup>+</sup> cluster expressing CD127<sup>+</sup> CCR7<sup>+</sup>  
168 was observed that remained relatively stable from birth up to 36 weeks. Collectively, these  
169 findings show an expansion of differentiated CD4<sup>+</sup> T cell subsets with age compared to the  
170 decreasing frequency of naïve cells after delivery (Collier *et al.*, 2015). The most dramatic  
171 changes were observed to occur in the first 7 weeks of life, a period of immune plasticity as  
172 the adaptive immune system is likely shaped by environmental antigens postpartum  
173 (Gensollen *et al.*, 2016; Torow and Hornef, 2017).

174

### 175 *Disrupted Th17-Treg ratio in iHEU*

176 We next parsed out differences between CD4<sup>+</sup> clusters in iHEU from iHUU, as it is known  
177 that there is a more activated threshold of pro-inflammatory cytokine production from innate  
178 immune cells (Reikie *et al.*, 2014) and skewed adaptive immunity towards activated and  
179 exhausted cells in iHEU (Rich *et al.*, 1997; Clerici *et al.*, 2000; Rainwater-Lovett *et al.*,  
180 2014). To assess whether these known alterations might be related to the Th17-Treg ratio, we  
181 compared the phenotype of CD4<sup>+</sup> cells of the 16 healthy infants (iHUU) with that of 20  
182 iHEU. MDS of marker expression revealed distinct clustering of CD4<sup>+</sup> T cell marker  
183 expression between iHEU vs iHUU, regardless of age (Figure 3A). The observed differences

184 were driven by significantly higher odds of Foxp3 and CD161 expression in iHUU compared  
185 to iHEU, which persisted until 36 weeks of age (Figure 3B). By 36 weeks, log-odds  
186 expression of  $\alpha 4\beta 7$  was also dependent on HIV exposure, being higher in iHEU compared to  
187 iHUU (Figure 3B). These findings show that CD4<sup>+</sup>T cells of iHEU can be distinguished from  
188 that of iHUU primarily by higher expression of Foxp3 and CD161, which are Treg and Th17  
189 discriminatory markers, respectively. We next performed differential abundance testing to  
190 assess whether HIV exposure alters the proportion of CD4<sup>+</sup> cell clusters defined in Figure  
191 2A. Compared to iHUU, iHEU had significantly higher proportions of  $\alpha 4\beta 7^+$  Th1/17 cluster  
192 at birth (Figure 3C). The minor, more highly suppressive CCR4<sup>+</sup> Treg cluster was lower at  
193 birth in iHEU compared to iHUU, albeit not statistically significant after adjusting for  
194 multiple comparisons (Figure 3C). Similarly, at 36 weeks, the gut homing  $\alpha 4\beta 7^+$  Treg cluster  
195 was lower in iHEU compared to iHUU (Figure 3C). No differences were observed in the  
196 CD4<sup>+</sup> clusters between iHEU and iHUU at week 7 and 15 (data not shown).

197

198 When we assessed the proportion of Th17 and Treg cells using our manual gating approach,  
199 we found no significant differences in the proportions of Th17 cells between iHEU and  
200 iHUU (Figure S2A). However, iHEU had significantly lower proportions of Treg cells at  
201 birth ( $p=0.017$ ) and at week 36 ( $p=0.012$ ; Figure S2B). This resulted in a higher Th17-Treg  
202 ratio at birth and significantly so at 36 weeks ( $p=0.039$ ) (Figure 3D). Overall, our data reveal  
203 that although circulating Th17 and Treg cells show similar stereotypic changes during  
204 infancy, iHEU have depressed frequencies of Treg cells accounting for the observed Th17-  
205 Treg imbalance at birth.

206

#### 207 *Treg and Th17 proportions associate with iFABP and gut-tropic chemokines and cytokines*

208 Previous reports of intestinal damage leading to inflammation in iHEU (Prendergast *et al.*,  
209 2017) led us to investigate the relationship between our different phenotypic clusters of cells  
210 with intestinal fatty-acid binding protein (iFABP) plasma concentrations. iFABP  
211 concentrations are elevated when there is impaired gut epithelial integrity leading to  
212 microbial translocation and gut inflammation (Wells *et al.*, 2017). Indeed, infant plasma  
213 concentrations of iFABP at birth were significantly higher in iHEU compared to iHUU  
214 (Figure 4A). By 36 weeks of life, no differences in iFABP concentrations were observed  
215 between iHEU and iHUU (Figure 4A), nor at weeks 7 and 15 (Figure S4A). We measured the  
216 concentration of inflammatory and regulatory chemokines and cytokines at birth and 36  
217 weeks. Of the 10 analytes measured (Figures 4B & S3B), CCL17 was significantly higher in  
218 iHEU compared to iHUU at birth (Figure 4B). The regulatory cytokine, IL-27, involved in



219 epithelial restitution (Diegelmann *et al.*, 2012) was observed to be higher in iHEU, albeit not  
220 statistically significant after correcting for multiple comparisons (Figure 4B).

221

222 To integrate the multimodal cellular and protein data, we used generalized canonical  
223 regression to calculate RV coefficients of the latent variables determined by sparse partial  
224 least squares (sPLS). Using this approach, we assembled cluster image maps showing the  
225 association between CD4<sup>+</sup> clusters and plasma analytes (Figure 4C & F). At birth the Treg  
226 clusters shared a similar association with the measured analytes and were in stark contrast to  
227 Th17 and CD127<sup>+</sup>CCR6<sup>+</sup>CCR7<sup>+</sup> clusters (Figure 4C). Treg cluster frequency correlated  
228 inversely with iFABP, CCL17 and CCL20 concentrations, while positively with Th17 cluster  
229 frequency. Since iFABP and CCL17 were higher in iHEU and inversely associated with the  
230 population of Treg clusters, we postulate that these cells could be moving out of circulation  
231 and trafficking to the gut via CCL17 to mitigate epithelial damage and/or inflammation.  
232 Furthermore, using sPLS discriminant analysis (PLS-DA), we were able to determine the  
233 weighted score of each variable to predict HIV exposure: CCL17, IL27, CCR4<sup>+</sup> Tregs,  
234 CD127<sup>+</sup>CCR7<sup>+</sup> T cells and iFABP were the strongest predictors of HIV exposure at birth with  
235 a classification error of 35% using latent variable-1 (LV-1) loadings (Figure 4D). ROC  
236 analysis using LV-1 loadings showed good discrimination between iHEU and iHUU with a  
237 highly significant (p=0.004) AUC of 0.85 (Figure 4E).

238

239 Although no differences in chemokine and cytokine concentrations were observed at 36  
240 weeks (Figure 4B and S4B), there were correlations between these analytes and CD4<sup>+</sup> T cell  
241 clusters that were similar to those found at birth (Figure 4F). Treg clusters (and the Th2  
242 cluster) were positively correlated with IL27 and inversely correlated to iFABP, whereas  
243 CD127<sup>+</sup>CCR6<sup>+</sup>CCR7<sup>+</sup> and  $\alpha 4\beta 7^+$  Th1/17 were inversely correlated to IL27 and positively to  
244 iFABP (Figure 4F). The strongest predictors of HIV exposure at 36 weeks were  $\alpha 4\beta 7^+$  Treg  
245 and  $\alpha 4\beta 7^+$  Th1/17 cell cluster together with IL17 and IL10, although having a higher  
246 classification error of 51% and LV-1 AUC=0.88 (Figures 4G & H). We further accessed the  
247 transcriptomic profile of Treg cells sorted into  $\alpha 4\beta 7^+$  and  $\alpha 4\beta 7^-$  populations (Figure S4A) at  
248 birth (n=4) and 15 weeks (n=5). According to PERMANOVA analysis considering HIV  
249 exposure, age and RNA integrity, HIV exposure explained 14% variance (p=0.047) of the  
250  $\alpha 4\beta 7^+$  Treg transcriptomic data set, while neither infant age nor RNA integrity were  
251 significant explanatory variables (Figure S4B). However, due to the small sample size we  
252 could not detect significant differentially expressed genes after adjusting for multiple  
253 comparisons (Data not shown). Collectively, these findings suggest that the perturbed Th17-



254 Treg ratio in iHEU could be related to intestinal epithelial gut damage or related to  
255 dysregulation of gut homeostatic balance, potentially by altered gut microbiota (Bender *et al.*,  
256 2016).

257

## 258 **Discussion**

259 This study demonstrates the intricate homeostatic balance of CD4<sup>+</sup> T cell subsets during  
260 infancy that is necessary for appropriate responses to neoantigens, including pathogens, non-  
261 inherited maternal antigens, gut commensals and autoantigens. Although serving opposite  
262 roles during an inflammatory response, Th17 and Treg cells share similar features; both are  
263 dependent on TGF- $\beta$  and IL-2 for their differentiation (Weaver *et al.*, 2006), exhibit  
264 specificity towards commensal-derived antigens and are abundant in the intestine to regulate  
265 homeostasis between the immune system and commensal microbes (Shen *et al.*, 2014).  
266 Overall, we observed a synchronous expansion of both Treg and Th17 cells early in life of  
267 healthy infants consistent with other reported studies (Black *et al.*, 2012; Collier *et al.*, 2015;  
268 Hayakawa *et al.*, 2017). The greatest increase observed was within the first 7 weeks of life  
269 suggesting a period of drastic changes as the infants are exposed to diverse environmental  
270 antigens and childhood vaccines and thus requires both the regulatory and inflammatory arms  
271 of the immune system.

272

273 We further demonstrate that HIV/ART exposure disrupts the emergent Th17-Treg  
274 homeostatic balance most likely via gut epithelial damage and potential homing of Treg cells  
275 to the gut at birth. It has previously been reported that iHEU, tend to display heightened  
276 immune activation compared to iHUU (Rich *et al.*, 1997; Clerici *et al.*, 2000; Rainwater-  
277 Lovett *et al.*, 2014), and we hypothesize from our data that this immune activation results  
278 from loss of balance between activation and tolerogenic signals. We provide evidence that  
279 the depressed Treg cells at birth in iHEU relative to iHUU are likely due to cells migrating  
280 out of circulation possibly to mitigate epithelial gut damage. This postulated model is based  
281 on a negative correlation between CCR4<sup>+</sup> and  $\alpha$ 4 $\beta$ 7<sup>+</sup> Treg cells with plasma concentrations  
282 of iFABP and elevated levels of CCL17 and IL-27 in iHEU. Collectively, these events result  
283 in delayed peripheral ontogeny of these cells in iHEU, although by 7 weeks, iFABP and Treg  
284 cell levels are comparable between iHEU and iHUU. There is then a further progressive loss  
285 of Treg cells at 36 weeks of life, suggesting that the Th17-Treg balance may fluctuate in  
286 iHEU. Such fluctuating regulatory:inflammatory balance could in part be explained by the  
287 shifting gut microbiota profiles during weaning, thus impacting gut-immune axis pre-  
288 conditioned at birth (Bäckhed *et al.*, 2015; Al Nabhani *et al.*, 2019).

289 Our dataset reveals two different Treg populations that categorize infants by HIV-exposure at  
290 birth and week 36. As discussed above, events at birth are best explained by the trafficking of  
291 suppressive population of Treg cells for the reconstitution of gut epithelial damage in iHEU.  
292 Our integrated datasets could still distinguish the two groups of infants at 36 weeks of age  
293 where Treg  $\alpha 4\beta 7^+$ -IL10 and Th1/17  $\alpha 4\beta 7^+$ -IL17 were predictive of iHUU and iHEU  
294 respectively. This evidence demonstrates long-lasting effects of *in utero* HIV and/or ARV  
295 exposure on the infants' Th17-Treg immune axis characteristic of the interplay of these  
296 immune cells in homeostatic maintenance in the gastrointestinal tract (Shen *et al.*, 2014;  
297 Omenetti and Pizarro, 2015).

298

299 This Th17-Treg imbalance is likely similar to the phenomenon that occurs in non-breastfed  
300 infants (Ardeshir *et al.*, 2014; Wood *et al.*, 2018). Th17-Treg imbalance has been reported in  
301 other infant diseases associated with gut damage such as neonatal necrotizing enterocolitis,  
302 where infants presenting with disease had lower frequencies of peripheral blood Treg cells  
303 (Pang *et al.*, 2018a, 2018b). These conditions are all associated with altered gut microbiota.  
304 Indeed, dysbiotic gut microbiota among iHEU relative to iHUU has been previously reported  
305 which could also explain altered inflammatory condition in the gut of iHEU associated with  
306 increased epithelial permeability (Bender *et al.*, 2016; Machiavelli *et al.*, 2019). iHEU were  
307 further observed to have significantly higher concentrations of IL-27 - a regulatory cytokine  
308 involved in wound healing including intestinal barrier protection (Diegelmann *et al.*, 2012;  
309 Yang *et al.*, 2017), and further supported that there was epithelial gut damage at birth.  
310 (Papasavvas *et al.*, 2011; Pilakka-Kanthikeel *et al.*, 2014). Whether this altered Th17/Treg  
311 ratio is associated with loss of tolerogenic signals as suggested by MHC inhibition from the  
312 transcriptomic data or an increased risk for disease among iHEU is unclear, but could in part  
313 explain the heightened risk of infections reported for iHEU compared to iHUU (Cohen *et al.*,  
314 2016; Slogrove *et al.*, 2016; Brennan *et al.*, 2019).

315

316 The strength of our study lies in the cohort and matching of breastfed infants born to women  
317 living with HIV to those living without HIV from the same clinic and dwelling area. Further  
318 studies would need to investigate whether Treg cells have differing chemotactic activity  
319 between iHEU and iHUU. It is interesting to note that Jalbert *et al.* (2019) reported higher  
320 frequencies of Treg cells in iHEU compared to iHUU (Jalbert *et al.*, 2019). However, this  
321 study used cord blood and compared iHUU from a U.S cohort with iHEU from South Africa.  
322 We showed that cord blood cellular constituents are distinct from birth peripheral blood and  
323 most likely does not reflect events in the newborn infant blood, agreeing with others (Olin *et*

324 *al.*, 2018). It is also very important to have stringent measures of Treg cells, where minimal  
325 markers would be CD4<sup>+</sup> CD25<sup>high</sup> Foxp3<sup>+</sup> CD127<sup>-</sup> (Santegoets *et al.*, 2015).

326

327 The postnatal period is a critical window for priming and the maturation of the infants'  
328 immune system and its interaction with commensal microbes to facilitate homeostasis  
329 (Gensollen *et al.*, 2016; Torow and Hornef, 2017). Perturbations occurring during this  
330 “window of opportunity” alter ontogeny of immune development and likely associate with  
331 long-term immune-related diseases (Gensollen *et al.*, 2016; Olin *et al.*, 2018). This study  
332 shows that impact of HIV/ARV in the mother reveals a nexus between the gut and Th17:Treg  
333 homeostatic balance in the newborn infant.

334

### 335 **Methods**

#### 336 *Study participants*

337 We conducted a longitudinal study on the effects of *in utero* HIV exposure on the phenotypic  
338 development of CD4<sup>+</sup> T lymphocytes during early infancy. Women were recruited to  
339 participate in the study within few hours following delivery as described (Tchakoute *et al.*,  
340 2018). Women aged  $\geq 18$  years, who experienced no complications during pregnancy and  
341 provided signed informed consent for themselves and their respective infants were enrolled  
342 into the study approved by human research ethics committee of University of Cape Town  
343 (FWA1637; IRB0001938). Infants with gestational age  $< 36$  weeks and birth weight  $< 2.4$  kg  
344 were excluded from study analysis. Peripheral blood was collected from the infants at birth  
345 ( $< 12$  h), 7, 15 and 36 weeks of infant age. Among infants born to mothers living with HIV,  
346 absence of HIV transmission was confirmed by performing HIV DNA PCR test at 6 weeks of  
347 infant age. All infants received childhood vaccines according to the South African extended  
348 program of immunization schedule. A total of 36 infants; 20 iHEU and 16 iHUU were  
349 included in this analysis and followed over 36 weeks of life. To reduce potential confounding  
350 factors, samples were selected that showed no demographic difference between the two  
351 groups of infants (Table S2). All mothers elected to exclusively breastfeed at birth, although  
352 by 7 weeks only 52.8% were determined to be still exclusively breastfeeding (Table S2).

353

#### 354 *Whole blood collection*

355 Blood was collected from the infants directly into sodium heparin tubes and transported to  
356 the laboratory for processing within 6h. BD FACS Lysing Solution (BD Biosciences, CA  
357 USA) was used for lysing of red blood cells and the fixation of the remaining peripheral  
358 blood mononuclear cells (PBMC) according to manufacturer's instructions. Fixed whole

359 blood cells were stored at  $-80^{\circ}\text{C}$  for 24 h in foetal calf serum with 10% DMSO and then  
360 cryopreserved at  $-180^{\circ}\text{C}$  until assayed using flow cytometry. Plasma samples were stored at -  
361  $80^{\circ}\text{C}$  until used for serological analysis in this study.

362

#### 363 *Flow cytometry analysis*

364 Immunophenotyping of  $\text{CD4}^+$  Th17 and Treg cells in infants was performed by staining  
365 thawed cells using a multi-colour antibody panel (Table S1). Lymphocytes were  
366 characterized by surface staining with antibodies specific to CD3, CD4 and CD8. To  
367 delineate Treg cells from the lymphocyte population, antibodies specific to surface makers  
368 CD127, CD25, CD39 and TIGIT together with transcription factor FoxP3 were used. Surface  
369 staining of CCR6, CCR4 and CD161 was used to define Th17 cells. Gut homing cells were  
370 defined using anti- $\alpha 4\beta 7$ -surface staining. Immune cells migrating to the lymph nodes were  
371 characterized using CCR7 specific antibodies. Data acquisition was performed using BD  
372 LSR II and analysed with FlowJo software (version 10.5.3, Tree Star Inc., CA).

373

#### 374 *Quantification of intestinal fatty acid binding proteins using ELISA*

375 Infant plasma samples collected at birth, 7, 15 and 36 weeks of age were used to measure the  
376 concentration of intestinal fatty-acid binding protein (IFABP) using a commercial ELISA kit  
377 (Elabscience). Test samples were diluted 1/400 in assay diluent and measured in duplicates  
378 according to manufacturer's instructions. An in-house high titre control plasma sample was  
379 included to determine intra-assay variation which had a coefficient of variation = 5.7%,  
380 indicating good intra-assay comparisons.

381

#### 382 *Quantification of chemokine and cytokine concentrations using multiplex immunoassay*

383 A 10-plex immunoassay was designed to measure plasma concentrations of chemokines and  
384 cytokines in infant plasma samples collected at birth and 36 weeks of age. Using the  
385 multiplex immunoassay kit (R&D systems, Minneapolis, MN), we measured CCL17,  
386 CCL22, CXCL10 (IP10), CCL20 (MIP3A), CCL25, IL-6, IL-7, IL-17A, IL-10 and IL-27  
387 concentrations according to manufacturer's instructions. Test samples were diluted 3:1 with  
388 assay diluent and signal intensity measured using Biorad-200 Luminex platform.

389

#### 390 *Transcriptomic analysis of Treg cells*

391 We analysed the transcriptomic profile of sorted Treg cell populations ( $\text{CD4}^+$   $\text{CD25}^{++}$   
392  $\text{CD127}^-$ ) using PBMC samples collected from iHUU and iHEU at birth and 15 weeks of age  
393 of the same cohort. Two subsets of Treg cells were evaluated based on their surface

394 expression of the gut homing marker ( $\alpha 4\beta 7$ ). Cells were purified using FACS Aria II (BD  
395 Science) into Fetal Calf Serum, washed and resuspended in RNAProtect (QAIGEN, Hilden,  
396 Germany). Extraction of RNA was carried out using RNeasy MicroPlus kit (QAIGEN,  
397 Hilden, Germany) according to manufacturer's instructions. Sample quality was assessed by  
398 Agilent RNA 6000 pico Reagent on Agilent 2100 Bioanalyzer (Agilent Technologies, Santa  
399 Clara, CA) and quantified by Qubit RNA HS assay (ThermoFisher, Waltham, MA). Samples  
400 were treated with DNase prior to library preparation. Library preparation was performed  
401 with SMARTer Stranded Total RNA-Seq kit Pico Input v2 (Clontech Inc, Mountain View,  
402 CA) following manufacturer's instructions. Average final library size was 350 bp. Illumina 8-  
403 nt dual-indices were used for multiplexing. Samples were pooled and sequenced on Illumina  
404 HiSeq X sequencer for 150 bp read length in paired-end mode, with an output of 80 million  
405 reads per sample. Illumina reads were processed using the nf-core rnaseq pipeline v1.4.2  
406 pipeline using GRCh37 genome as reference sequence (Ewels *et al.*, 2020). Briefly, reads  
407 were trimmed with Trim Galore, ribosomal RNA removed with SortMeRNA (Kopylova, Noé  
408 and Touzet, 2012), read alignment was performed using STAR (Dobin *et al.*, 2013), and  
409 mapped reads were summarized at gene level using the featureCounts function from the R  
410 package Rsubread (Liao, Smyth and Shi, 2019).

411

#### 412 *Statistical analysis*

413 R software (version 3.5 R Core Team, Vienna, Austria) was used to test for statistical  
414 differences. The cell populations described in the study are reported as median percentages.  
415 iFABP concentrations were  $\log_{10}$  transformed for statistical comparisons. Nominal variables  
416 were compared using  $\chi^2$  or Fisher exact test. Differences in cell frequencies between the two  
417 groups of infants were compared using the Mann-Whitney U test. Friedman's test was used  
418 to compare differences within a group over time. Chemokine and cytokines included in a  
419 multiplex immunoassay were compared using Mann-Whitney test and Bonferroni correction  
420 used to adjust for multiple comparisons.

421 Coordinates for multi-dimensional scaling for the markers expressed on CD4<sup>+</sup> cells were  
422 calculated using metaMDS function and PERMANOVA statistical differences performed  
423 using the adonis function from the vegan R package. GLMM analysis was performed using  
424 an open-source R package CytoGLMM as described in (Seiler *et al.*, 2021). Unsupervised  
425 cell population identification was performed using self-organizing map and hierarchal  
426 clustering as implemented in the FlowSOM and metaclustering R packages (Nowicka *et al.*,  
427 2017). The mixomics R package was used to integrate the identified CD4<sup>+</sup> cell clusters with

428 the measured plasma analytes. RV coefficients were computed, and the latent variables  
429 determined by sparse partial least squares (sPLS). To determine the strongest predictors of  
430 HIV exposure at birth and week 36 we performed sPLS-DA and computed the loading plot  
431 and ROC plot of component 1 of all variables in our data set (Rohart *et al.*, 2017).  $p$ -value <  
432 0.05 was considered statistically significant.

433

#### 434 **Acknowledgments**

435 The authors would like to thank all the mothers and infants who volunteered to participate in  
436 this study and the dedicated work of the INFANT team. This study was supported by the  
437 South African Medical Research Council (SA-MRC) Self-Initiated Research Grant and NIH  
438 awards U01 AI131302 and R01 HD102050. SD is supported by the Claude Leon Fellowship.

439

#### 440 **Author contributions**

441 The study was conceived and designed by SD, CAB, HBJ and CMG. SD, MSSS and AK  
442 designed flow cytometry and cell sorting experiments. BA and HBJ were responsible for  
443 participant enrolment, sample collection and processing. Data generation and acquisition was  
444 performed by SD and analysed by SD, KL, and SPH. SD drafted the original manuscript that  
445 was reviewed and edited by all authors.

446

#### 447 **Declaration of Interest**

448 The authors declare no competing interests.

449

#### 450 **Figure legends**

451 **Figure 1** Stereotypic expansion of Th17 and Treg cells from birth to 36 weeks. A & B)  
452 Kinetic changes in the frequency of Th17 and Treg cells from birth up until 36 weeks of age.  
453 C) Spearman rank correlation between Th17 and Treg cells. D) UMAP analysis displaying  
454 Foxp3 and CD161 expression in CD4<sup>+</sup> cells distinguishing co-lineage of Treg cells and Th17  
455 cells. E) Multidimensional scaling (MDS) showing dissimilarity of CD4<sup>+</sup> cells from cord and  
456 peripheral blood at birth. B) Generalized linear mixed model comparing CD4 marker  
457 expression between cord blood and peripheral blood at birth.

458

459 **Figure 2** Identity of heterogenous CD4 clusters during infancy. A) Hierarchical clustering of  
460 CD4<sup>+</sup> cell clusters identified using FlowSOM. B) Dimensional reduction projecting the CD4  
461 clusters on UMAP. C) Relative abundance of CD4<sup>+</sup> cell clusters at birth, 7, 15 and 36 weeks.  
462 D) Boxplot showing stereotypic changes in CD4 clusters with increasing infant age.



463

464 **Figure 3** In utero HIV exposure disrupts Th17/Treg ratio during infancy A) Multidimensional scaling (MDS) showing dissimilarity of CD4<sup>+</sup> between HIV-exposed uninfected infants (iHEU) and HIV-unexposed uninfected infants (iHUU). B) Generalized linear mixed model comparing CD4 marker expression between iHEU and iHUU. C) Differential abundance of CD4 cell clusters in iHEU and iHUU at birth and week 36. D) Log<sub>2</sub> Th17/Treg ratio.

470

471 **Figure 4** Gut epithelial integrity and proinflammatory and regulatory milieu associated with Th17 and Treg cells. A) Comparing intestinal fatty acid binding protein (iFABP) concentration between HIV-unexposed uninfected infants (iHUU) and HIV-exposed uninfected infants (iHEU). B) Chemokine and cytokine concentrations in iHUU and iHEU at birth and 36 weeks. C) Cluster image map showing RV correlation of CD4 clusters with iFABP, chemokine and cytokine concentrations. D) Sparse PLS discriminant analysis (sPLS-DA) between HUU and HEU using CD4 clusters and chemokine data set E) ROC-curve analysis of LV-1 loadings at birth. F) Cluster image map of CD4 clusters and iFABP, chemokine and cytokine concentrations. G) sPLS-DA H) ROC-curve analysis of LV-1 loadings at week 36.

481

## 482 **Supplementary information**

### 483 **Table legends**

484 **Table S1** Flow cytometry antibody panel used to surface and intracellular stain infant whole blood to characterize T cells.

486 **Table S2** Demographic characteristic of HIV infected-exposed and HIV uninfected-unexposed mother-infant pairs.

488

### 489 **Figure legends**

490 **Figure S1** Flow cytometry gating strategy to identify T regulatory and Th17 cells.

491 **Figure S2** Ontological changes of CD4<sup>+</sup> cells in HIV-exposed uninfected (HEU) and HIV-unexposed uninfected (HUU) infants. A) Th17 and B) Treg cells.

493 **Figure S3 Plasma analytes measure in HIV-exposed uninfected infants (iHEU) and HIV-unexposed uninfected infants (iHUU).** A) Comparisons of iFABP concentrations between iHEU and iHUU measured at 7 and 15 weeks. B) Chemokine and cytokine concentrations measured at birth and 36 weeks of age.

496



497 **Figure S4** HIV exposure alters transcriptomic profile of gut homing Treg cells. A) Flow plot  
498 showing sorting of  $\alpha 4\beta 7^-$  and  $\alpha 4\beta 7^+$  Treg cells. B) NMDS plots showing Bray Curtis  
499 distances between infant samples.

500

## 501 **References**

- 502 Ardeshir, A. *et al.* (2014) ‘Breast-fed and bottle-fed infant rhesus macaques develop distinct  
503 gut microbiotas and immune systems’, *Science Translational Medicine*, 6(252). doi:  
504 10.1126/scitranslmed.3008791.
- 505 Bäckhed, F. *et al.* (2015) ‘Dynamics and stabilization of the human gut microbiome during  
506 the first year of life’, *Cell Host and Microbe*, 17(5), pp. 690–703. doi:  
507 10.1016/j.chom.2015.04.004.
- 508 Bender, J. M. *et al.* (2016) ‘Maternal HIV infection influences the microbiome of HIV-  
509 uninfected infants’, *Science Translational Medicine*, 8(349), p. 349ra100.
- 510 Black, A. *et al.* (2012) ‘Developmental regulation of Th17-cell capacity in human neonates’,  
511 *European Journal of Immunology*, 42(2), pp. 311–319. doi: 10.1002/eji.201141847.
- 512 Borsellino, G. *et al.* (2007) ‘Expression of ectonucleotidase CD39 by Foxp3+ Treg cells:  
513 hydrolysis of extracellular ATP and immune suppression’, *Blood*, 110(4), pp. 1225–1232.  
514 doi: 10.1182/blood-2006-12-064527.The.
- 515 Brennan, A. T. *et al.* (2016) ‘A meta-analysis assessing all-cause mortality in HIVexposed  
516 uninfected compared with HIV-unexposed uninfected infants and children’, *Aids*, 30(15), pp.  
517 2351–2360. doi: 10.1097/QAD.0000000000001211.
- 518 Brennan, A. T. *et al.* (2019) ‘A meta-analysis assessing diarrhea and pneumonia in HIV-  
519 exposed uninfected compared to HIV-unexposed uninfected infants and children’, *JAIDS*  
520 *Journal of Acquired Immune Deficiency Syndromes*, 82(1), pp. 1–8. doi:  
521 10.1097/qai.0000000000002097.
- 522 Bystrom, J. *et al.* (2019) ‘Functional and phenotypic heterogeneity of Th17 cells in health  
523 and disease’, *European Journal of Clinical Investigation*, 49(1), pp. 1–13. doi:  
524 10.1111/eci.13032.
- 525 Clerici, M. *et al.* (2000) ‘T-lymphocyte maturation abnormalities in uninfected newborns and  
526 children with vertical exposure to HIV T-lymphocyte maturation abnormalities in uninfected  
527 newborns and children with vertical exposure to HIV’, *Blويد*, 96, pp. 3866–3871.
- 528 Cohen, C. *et al.* (2016) ‘Epidemiology of Acute Lower Respiratory Tract Infection in HIV-  
529 Exposed Uninfected Infants’, *Pediatrics*, 137(4), p. e20153272.
- 530 Collier, F. M. *et al.* (2015) ‘The ontogeny of naive and regulatory CD4+ T-cell subsets duing  
531 the first postnatal year: a cohort study’, *Clinical and Translational Immunology*, 4(3), p. e34.

- 532 doi: 10.1038/cti.2015.2.
- 533 Cosmi, L. *et al.* (2008) ‘Human interleukin 17-producing cells originate from a CD161  
534 +CD4+ T cell precursor’, *Journal of Experimental Medicine*, 205(8), pp. 1903–1916. doi:  
535 10.1084/jem.20080397.
- 536 Diegelmann, J. *et al.* (2012) ‘A novel role for interleukin-27 (IL-27) as mediator of intestinal  
537 epithelial barrier protection mediated via differential signal transducer and activator of  
538 transcription (STAT) protein signaling and induction of antibacterial and anti-inflammatory  
539 protei’, *Journal of Biological Chemistry*, 287(1), pp. 286–298. doi:  
540 10.1074/jbc.M111.294355.
- 541 Dirix, V., Vermeulen, F. and Mascart, F. (2013) ‘Maturation of CD4+ regulatory T  
542 lymphocytes and of cytokine secretions in infants born prematurely’, *Journal of Clinical  
543 Immunology*, 33(6), pp. 1126–1133. doi: 10.1007/s10875-013-9911-4.
- 544 Dobin, A. *et al.* (2013) ‘STAR: Ultrafast universal RNA-seq aligner’, *Bioinformatics*, 29(1),  
545 pp. 15–21. doi: 10.1093/bioinformatics/bts635.
- 546 Dowling, D. J. and Levy, O. (2014) ‘Ontogeny of early life immunity’, *Trends in  
547 Immunology*. Elsevier Ltd, 35(7), pp. 299–310. doi: 10.1016/j.it.2014.04.007.
- 548 Ewels, P. A. *et al.* (2020) ‘The nf-core framework for community-curated bioinformatics  
549 pipelines’, *Nature Biotechnology*, 38(3), pp. 276–278. doi: 10.1038/s41587-020-0439-x.
- 550 Gagliani, N. *et al.* (2015) ‘Th17 cells transdifferentiate into regulatory T cells during  
551 resolution of inflammation.’, *Nature*, 523(7559), pp. 221–5. doi: 10.1038/nature14452.
- 552 Gensollen, T. *et al.* (2016) ‘How colonization by microbiota in early life shapes the immune  
553 system’, *Science*, 352(6285), pp. 539–544. doi: 10.1126/science.aad9378.
- 554 Hayakawa, S. *et al.* (2017) ‘Significant augmentation of regulatory T cell numbers occurs  
555 during the early neonatal period’, *Clinical and Experimental Immunology*, 190(2), pp. 268–  
556 279. doi: 10.1111/cei.13008.
- 557 Ivarsson, M. A. *et al.* (2013) ‘Differentiation and functional regulation of human fetal NK  
558 cells’, *Journal of Clinical Investigation*, 123(9), pp. 3889–3901. doi: 10.1172/JCI68989.
- 559 Jalbert, E. *et al.* (2019) ‘HIV-exposed uninfected infants have increased regulatory T cells  
560 that correlate with decreased T cell function’, *Frontiers in Immunology*, 10(MAR), pp. 1–9.  
561 doi: 10.3389/fimmu.2019.00595.
- 562 Joller, N. *et al.* (2014) ‘Treg cells expressing the co-inhibitory molecule TIGIT selectively  
563 inhibit pro-inflammatory Th1 and Th17 cell responses’, *Immunity*, 40(4), pp. 569–581. doi:  
564 10.1016/j.immuni.2014.02.012.Treg.
- 565 Kollmann, T. R. *et al.* (2012) ‘Innate Immune Function by Toll-like Receptors: Distinct  
566 Responses in Newborns and the Elderly’, *Immunity*. Elsevier Inc., 37(5), pp. 771–783. doi:

- 567 10.1016/j.immuni.2012.10.014.
- 568 Kopylova, E., Noé, L. and Touzet, H. (2012) ‘SortMeRNA: Fast and accurate filtering of  
569 ribosomal RNAs in metatranscriptomic data’, *Bioinformatics*, 28(24), pp. 3211–3217. doi:  
570 10.1093/bioinformatics/bts611.
- 571 Kraft, J. D. *et al.* (2013) ‘Neonatal macrophages express elevated levels of interleukin-27 that  
572 oppose immune responses’, *Immunology*, 139(4), pp. 484–493. doi: 10.1111/imm.12095.
- 573 Liao, Y., Smyth, G. K. and Shi, W. (2019) ‘The R package Rsubread is easier, faster, cheaper  
574 and better for alignment and quantification of RNA sequencing reads’, *Nucleic Acids*  
575 *Research*. Oxford University Press, 47(8). doi: 10.1093/nar/gkz114.
- 576 Liu, L. *et al.* (2016) ‘Global, regional, and national causes of under-5 mortality in 2000–15:  
577 an updated systematic analysis with implications for the Sustainable Development Goals’,  
578 *The Lancet*. The Author(s). Published by Elsevier Ltd. This is an Open Access article under  
579 the CC BY license, 388(10063), pp. 3027–3035. doi: 10.1016/S0140-6736(16)31593-8.
- 580 Machiavelli, A. *et al.* (2019) ‘The impact of in utero HIV exposure on gut microbiota,  
581 inflammation, and microbial translocation’, *Gut Microbes*. Taylor & Francis, 10(5), pp. 599–  
582 614. doi: 10.1080/19490976.2018.1560768.
- 583 Matos, T. R. *et al.* (2021) ‘Maturation and Phenotypic Heterogeneity of Human CD4+  
584 Regulatory T Cells From Birth to Adulthood and After Allogeneic Stem Cell  
585 Transplantation’, *Frontiers in Immunology*, 11(January), pp. 1–10. doi:  
586 10.3389/fimmu.2020.570550.
- 587 Mold, J. E. *et al.* (2010) ‘Fetal and Adult Hematopoietic Stem Cells Give Rise to Distinct T  
588 Cell Lineages in Humans’, *Science*, 330(6011), pp. 1695–9.
- 589 Al Nabhani, Z. *et al.* (2019) ‘A Weaning Reaction to Microbiota Is Required for Resistance  
590 to Immunopathologies in the Adult’, *Immunity*, 50(5), pp. 1276-1288.e5. doi:  
591 10.1016/j.immuni.2019.02.014.
- 592 Noack, M. and Miossec, P. (2014) ‘Th17 and regulatory T cell balance in autoimmune and  
593 inflammatory diseases’, *Autoimmunity Reviews*. Elsevier B.V., 13(6), pp. 668–677. doi:  
594 10.1016/j.autrev.2013.12.004.
- 595 Nowicka, M. *et al.* (2017) ‘CyTOF workflow: Differential discovery in high-throughput  
596 high-dimensional cytometry datasets’, *F1000Research*, 6(748). doi:  
597 10.12688/f1000research.11622.1.
- 598 Olin, A. *et al.* (2018) ‘Stereotypic Immune System Development in Newborn Children’, *Cell*.  
599 Elsevier Inc., 174(5), pp. 1277-1292.e14. doi: 10.1016/j.cell.2018.06.045.
- 600 Omenetti, S. and Pizarro, T. T. (2015) ‘The Treg/Th17 axis: A dynamic balance regulated by  
601 the gut microbiome’, *Frontiers in Immunology*, 6(DEC), pp. 1–8. doi:

602 10.3389/fimmu.2015.00639.

603 Pang, Y. *et al.* (2018a) ‘Impairment of regulatory T cells in patients with neonatal necrotizing  
604 enterocolitis’, *International Immunopharmacology*. Elsevier, 63(May), pp. 19–25. doi:  
605 10.1016/j.intimp.2018.07.029.

606 Pang, Y. *et al.* (2018b) ‘Monocyte activation and inflammation can exacerbate Treg/Th17  
607 imbalance in infants with neonatal necrotizing enterocolitis’, *International*  
608 *Immunopharmacology*. Elsevier, 59(April), pp. 354–360. doi: 10.1016/j.intimp.2018.04.026.

609 Papasavvas, E. *et al.* (2011) ‘Increased microbial translocation in  $\leq 180$  days old perinatally  
610 human immunodeficiency virus-positive infants as compared with human immunodeficiency  
611 virus-exposed uninfected infants of similar age’, *Pediatric Infectious Disease Journal*,  
612 30(10), pp. 877–882. doi: 10.1097/INF.0b013e31821d141e.

613 Pilakka-Kanthikeel, S. *et al.* (2014) ‘Immune activation is associated with increased gut  
614 microbial translocation in treatment-naive, HIV-infected children in a resource-limited  
615 setting’, *Journal of Acquired Immune Deficiency Syndromes*, 66(1), pp. 16–24. doi:  
616 10.1097/QAI.0000000000000096.

617 Prendergast, A. J. *et al.* (2017) ‘Intestinal Damage and Inflammatory Biomarkers in Human  
618 Immunodeficiency Virus (HIV)-Exposed and HIV-Infected Zimbabwean Infants’, *Journal of*  
619 *Infectious Diseases*, 216(6), pp. 651–661. doi: 10.1093/infdis/jix367.

620 Rainwater-Lovett, K. *et al.* (2014) ‘Changes in Cellular Immune Activation and Memory T  
621 Cell Subsets in HIV-Infected Zambian Children Receiving HAART.’, *Journal of acquired*  
622 *immune deficiency syndromes (1999)*, 67(5), pp. 455–462. doi:  
623 10.1097/QAI.0000000000000342.

624 Reikie, B. A. *et al.* (2014) ‘Altered innate immune development in HIV-exposed uninfected  
625 infants’, *Journal of Acquired Immune Deficiency Syndrome*, 66(3), pp. 245–255. doi:  
626 10.1097/QAI.0000000000000161.Alttered.

627 Rich, K. C. *et al.* (1997) ‘Function and phenotype of immature CD4+ lymphocytes in healthy  
628 infants and early lymphocyte activation in uninfected infants of human immunodeficiency  
629 virus-infected mothers.’, *Clinical and diagnostic laboratory immunology*, 4(3), pp. 358–361.

630 Rohart, F. *et al.* (2017) ‘mixOmics: An R package for ‘omics feature selection and multiple  
631 data integration’, *PLoS Computational Biology*, 13(11), pp. 1–19. doi:  
632 10.1371/journal.pcbi.1005752.

633 Santegoets, S. J. A. M. *et al.* (2015) ‘Monitoring regulatory T cells in clinical samples:  
634 consensus on an essential marker set and gating strategy for regulatory T cell analysis by  
635 flow cytometry’, *Cancer Immunology, Immunotherapy*. Springer Berlin Heidelberg, 64(10),  
636 pp. 1271–1286. doi: 10.1007/s00262-015-1729-x.

- 637 Sehrawat, S. and Rouse, B. T. (2017) 'Interplay of regulatory T cell and Th17 cells during  
638 infectious diseases in humans and animals', *Frontiers in Immunology*, 8(APR), pp. 1–14. doi:  
639 10.3389/fimmu.2017.00341.
- 640 Seiler, C. *et al.* (2021) 'CytoGLMM: conditional differential analysis for flow and mass  
641 cytometry experiments', *BMC Bioinformatics*. BioMed Central, 22(1), pp. 1–14. doi:  
642 10.1186/s12859-021-04067-x.
- 643 Shen, X. *et al.* (2014) 'The balance of intestinal Foxp3+ regulatory T cells and Th17 cells and  
644 its biological significance', *Expert Review of Clinical Immunology*, 10(3), pp. 353–362. doi:  
645 10.1586/1744666X.2014.882232.
- 646 Slogrove, A. L. *et al.* (2016) 'Pattern of Infectious Morbidity in HIV-Exposed Uninfected  
647 Infants and Children', *Frontiers in Immunology*, 7(164), pp. 1–8. doi:  
648 10.3389/fimmu.2016.00164.
- 649 Slogrove, A. L. *et al.* (2020) 'Estimates of the global population of children who are HIV-  
650 exposed and uninfected, 2000–18: a modelling study', *The Lancet Global Health*. The  
651 Author(s). Published by Elsevier Ltd. This is an Open Access article under the CC BY-NC-  
652 ND 4.0 license, 8(1), pp. e67–e75. doi: 10.1016/S2214-109X(19)30448-6.
- 653 Tchakoute, C. T. *et al.* (2018) 'Breastfeeding mitigates the effects of maternal HIV on infant  
654 infectious morbidity in the Option B+ era', *AIDS (London, England)*, 32(16), pp. 2383–2391.  
655 doi: 10.1097/QAD.0000000000001974.
- 656 Torow, N. and Hornef, M. W. (2017) 'The Neonatal Window of Opportunity: Setting the  
657 Stage for Life-Long Host-Microbial Interaction and Immune Homeostasis', *The Journal of*  
658 *Immunology*, 198(2), pp. 557–563. doi: 10.4049/jimmunol.1601253.
- 659 Weaver, C. T. *et al.* (2006) 'Th17: An Effector CD4 T Cell Lineage with Regulatory T Cell  
660 Ties', *Immunity*, 24(6), pp. 677–688. doi: 10.1016/j.immuni.2006.06.002.
- 661 Wells, J. M. *et al.* (2017) 'Homeostasis of the gut barrier and potential biomarkers',  
662 *American Journal of Physiology - Gastrointestinal and Liver Physiology*, 312(3), pp. G171–  
663 G193. doi: 10.1152/ajpgi.00048.2015.
- 664 Wood, L. F. *et al.* (2018) 'Feeding-Related Gut Microbial Composition Associates with  
665 Peripheral T-Cell Activation and Mucosal Gene Expression in African Infants', *Clinical*  
666 *Infectious Diseases*, 67(8), pp. 1237–1246. doi: 10.1093/cid/ciy265.
- 667 Yang, B. *et al.* (2017) 'IL-27 Facilitates Skin Wound Healing through Induction of  
668 Epidermal Proliferation and Host Defense', *Journal of Investigative Dermatology*, 137(5),  
669 pp. 1166–1175. doi: 10.1016/j.jid.2017.01.010.
- 670

**A**

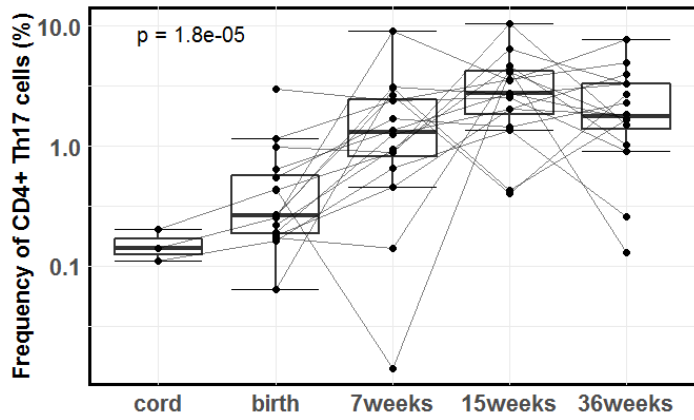

**B**

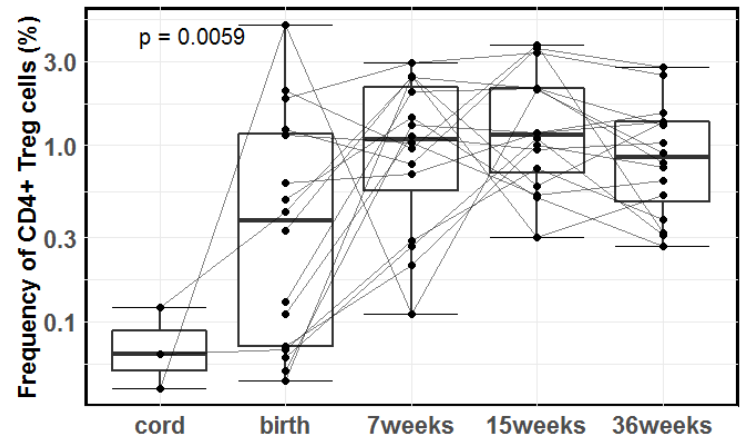

**C**

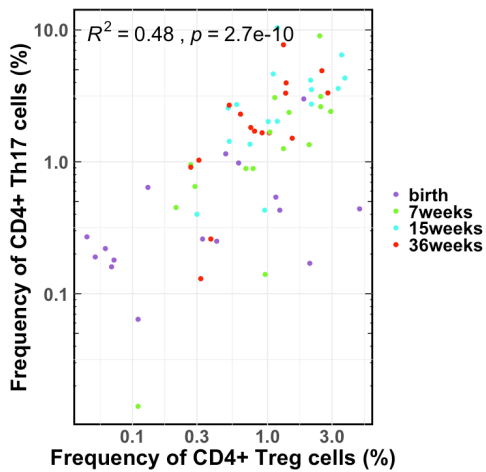

**D**

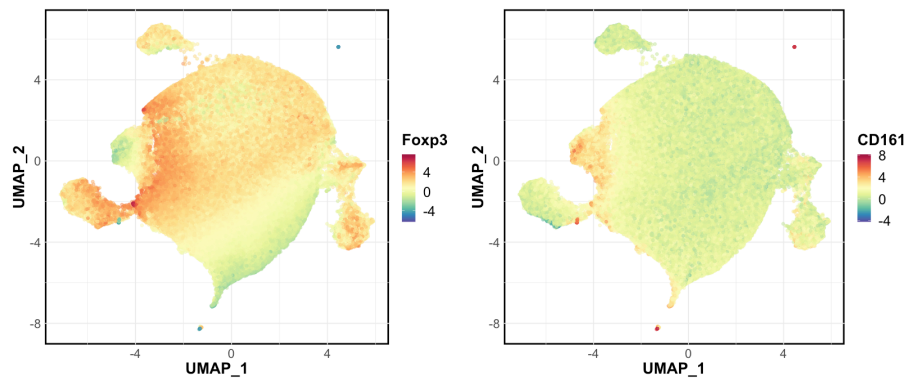

**E**

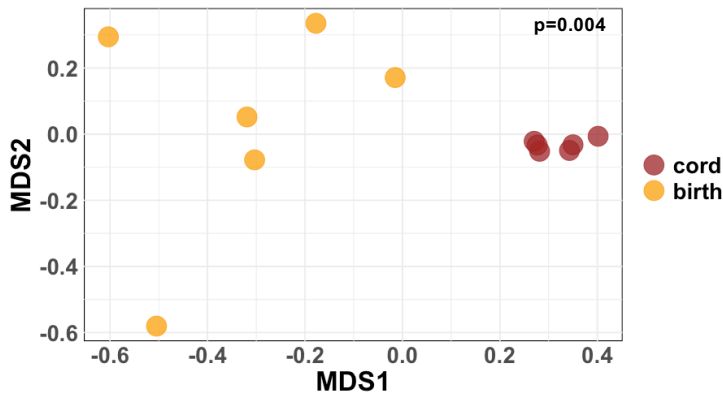

**F**

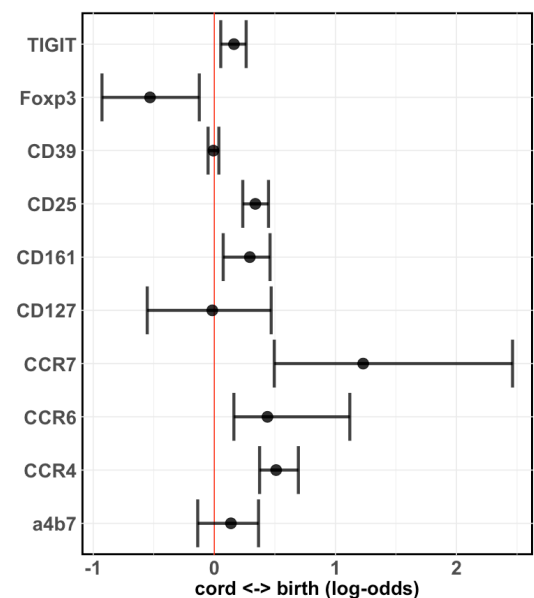

**Figure 1** Stereotypic expansion of Th17 and Treg cells from birth to 36 weeks. A & B) Kinetic changes in the frequency of Th17 and Treg cells from birth up until 36 weeks of age. C) Spearman rank correlation between Th17 and Treg cells. D) UMAP analysis displaying Foxp3 and CD161 expression in CD4<sup>+</sup> cells distinguishing co-lineage of Treg cells and Th17 cells. E) Multidimensional scaling (MDS) showing dissimilarity of CD4<sup>+</sup> cells from cord and peripheral blood at birth. B) Generalized linear mixed model comparing CD4 marker expression between cord blood and peripheral blood at birth



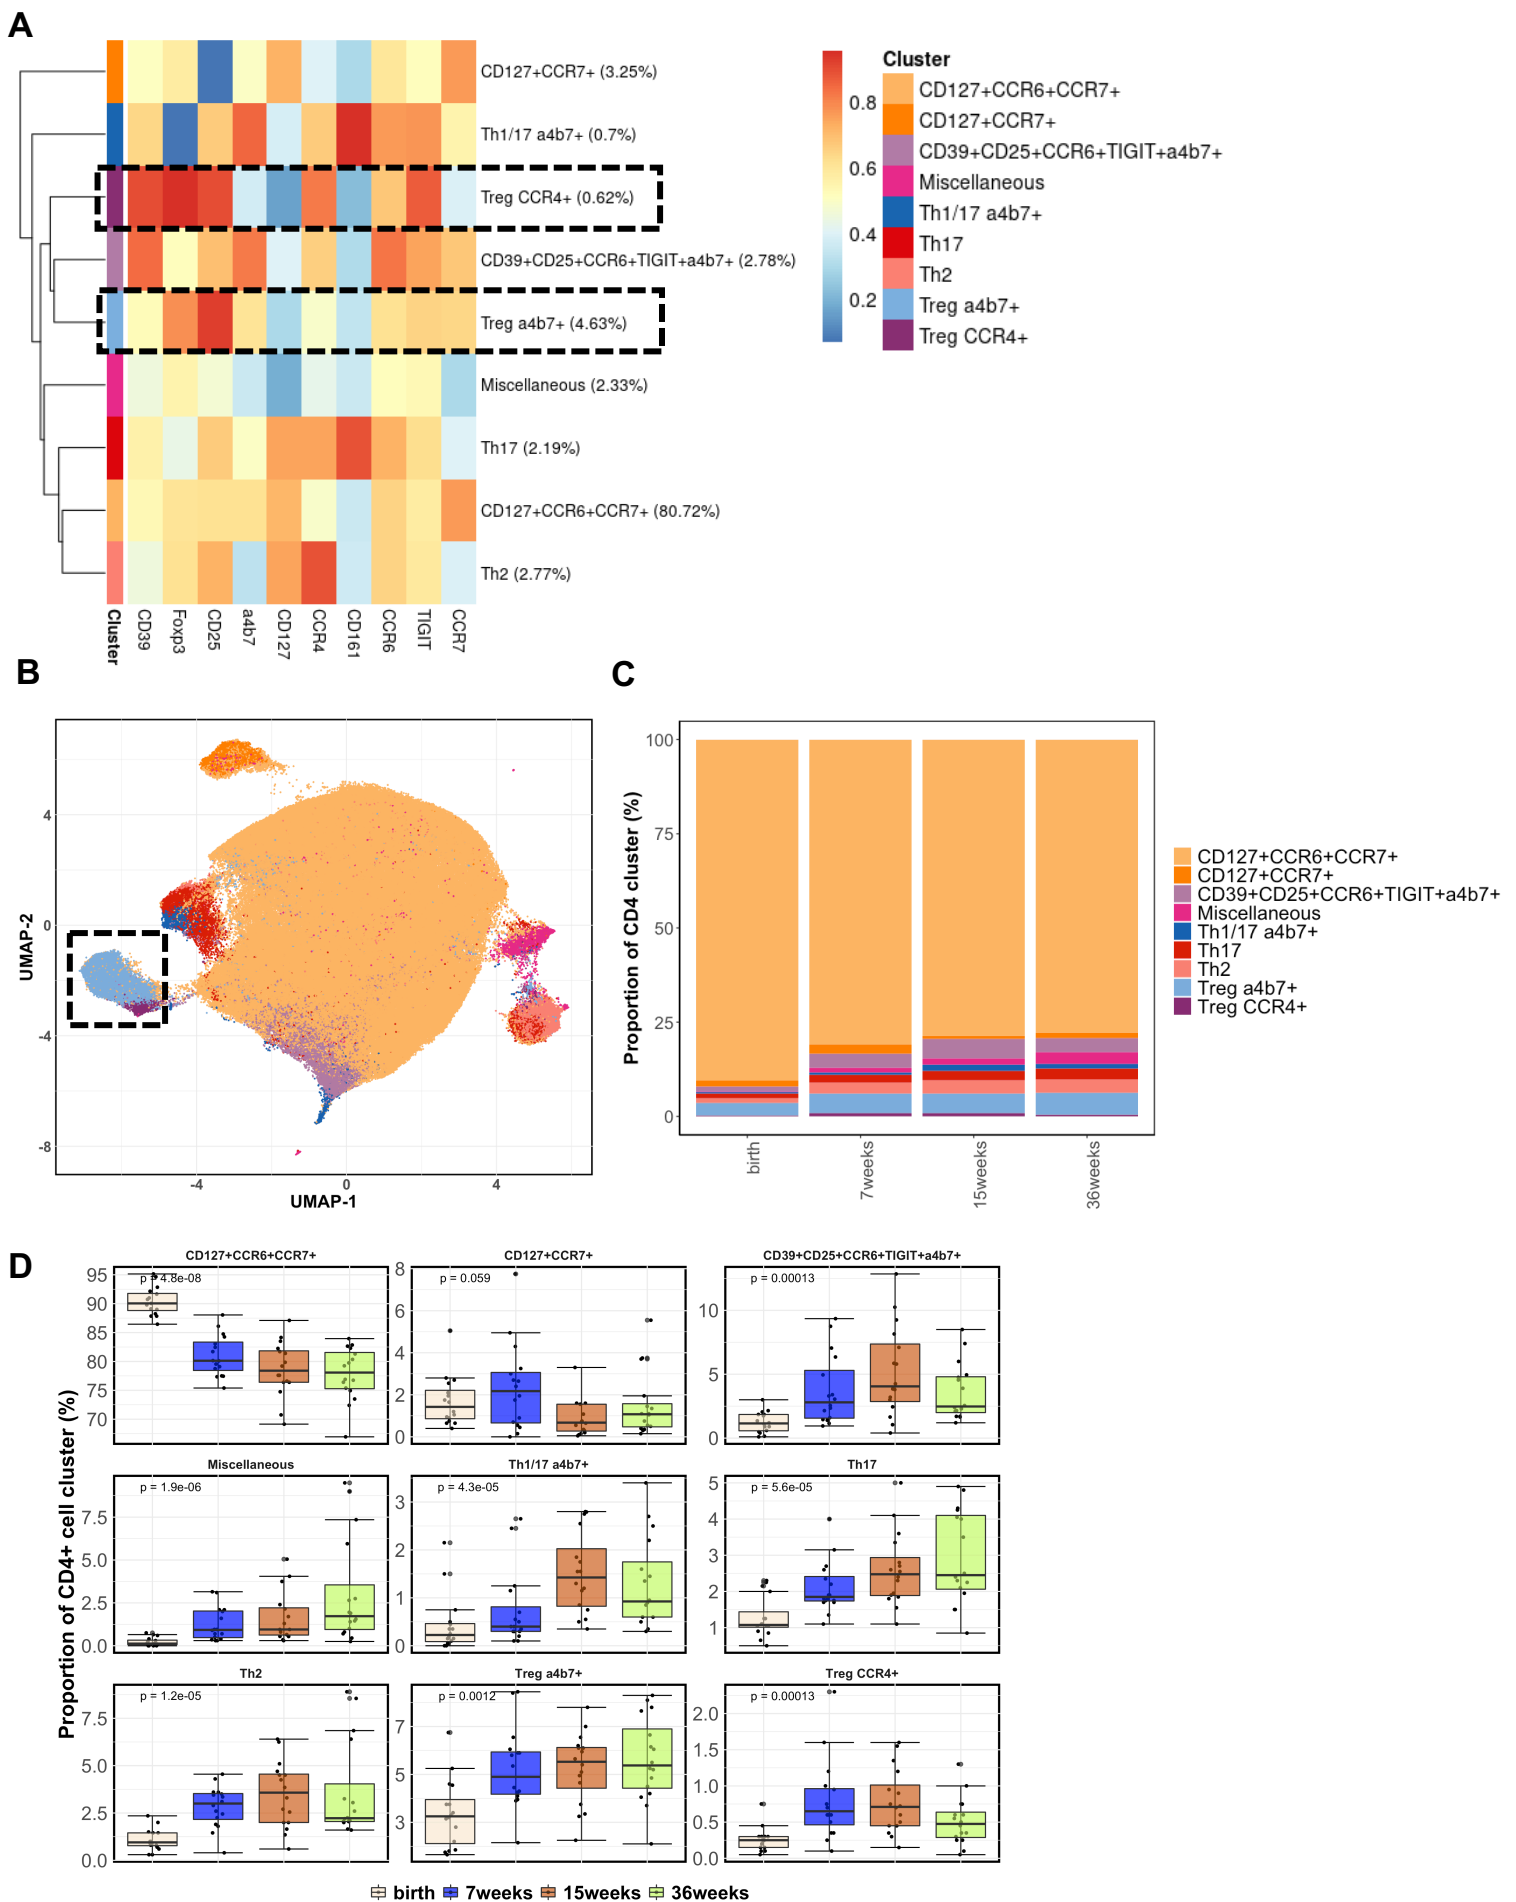

**Figure 2** Identity of heterogenous CD4 clusters during infancy. A) Hierarchical clustering of CD4<sup>+</sup> cell clusters identified using FlowSOM. B) Dimensional reduction projecting the CD4 clusters on UMAP. C) Relative abundance of CD4<sup>+</sup> cell clusters at birth, 7, 15 and 36 weeks. D) Boxplot showing stereotypic changes in CD4 clusters with increasing infant age.



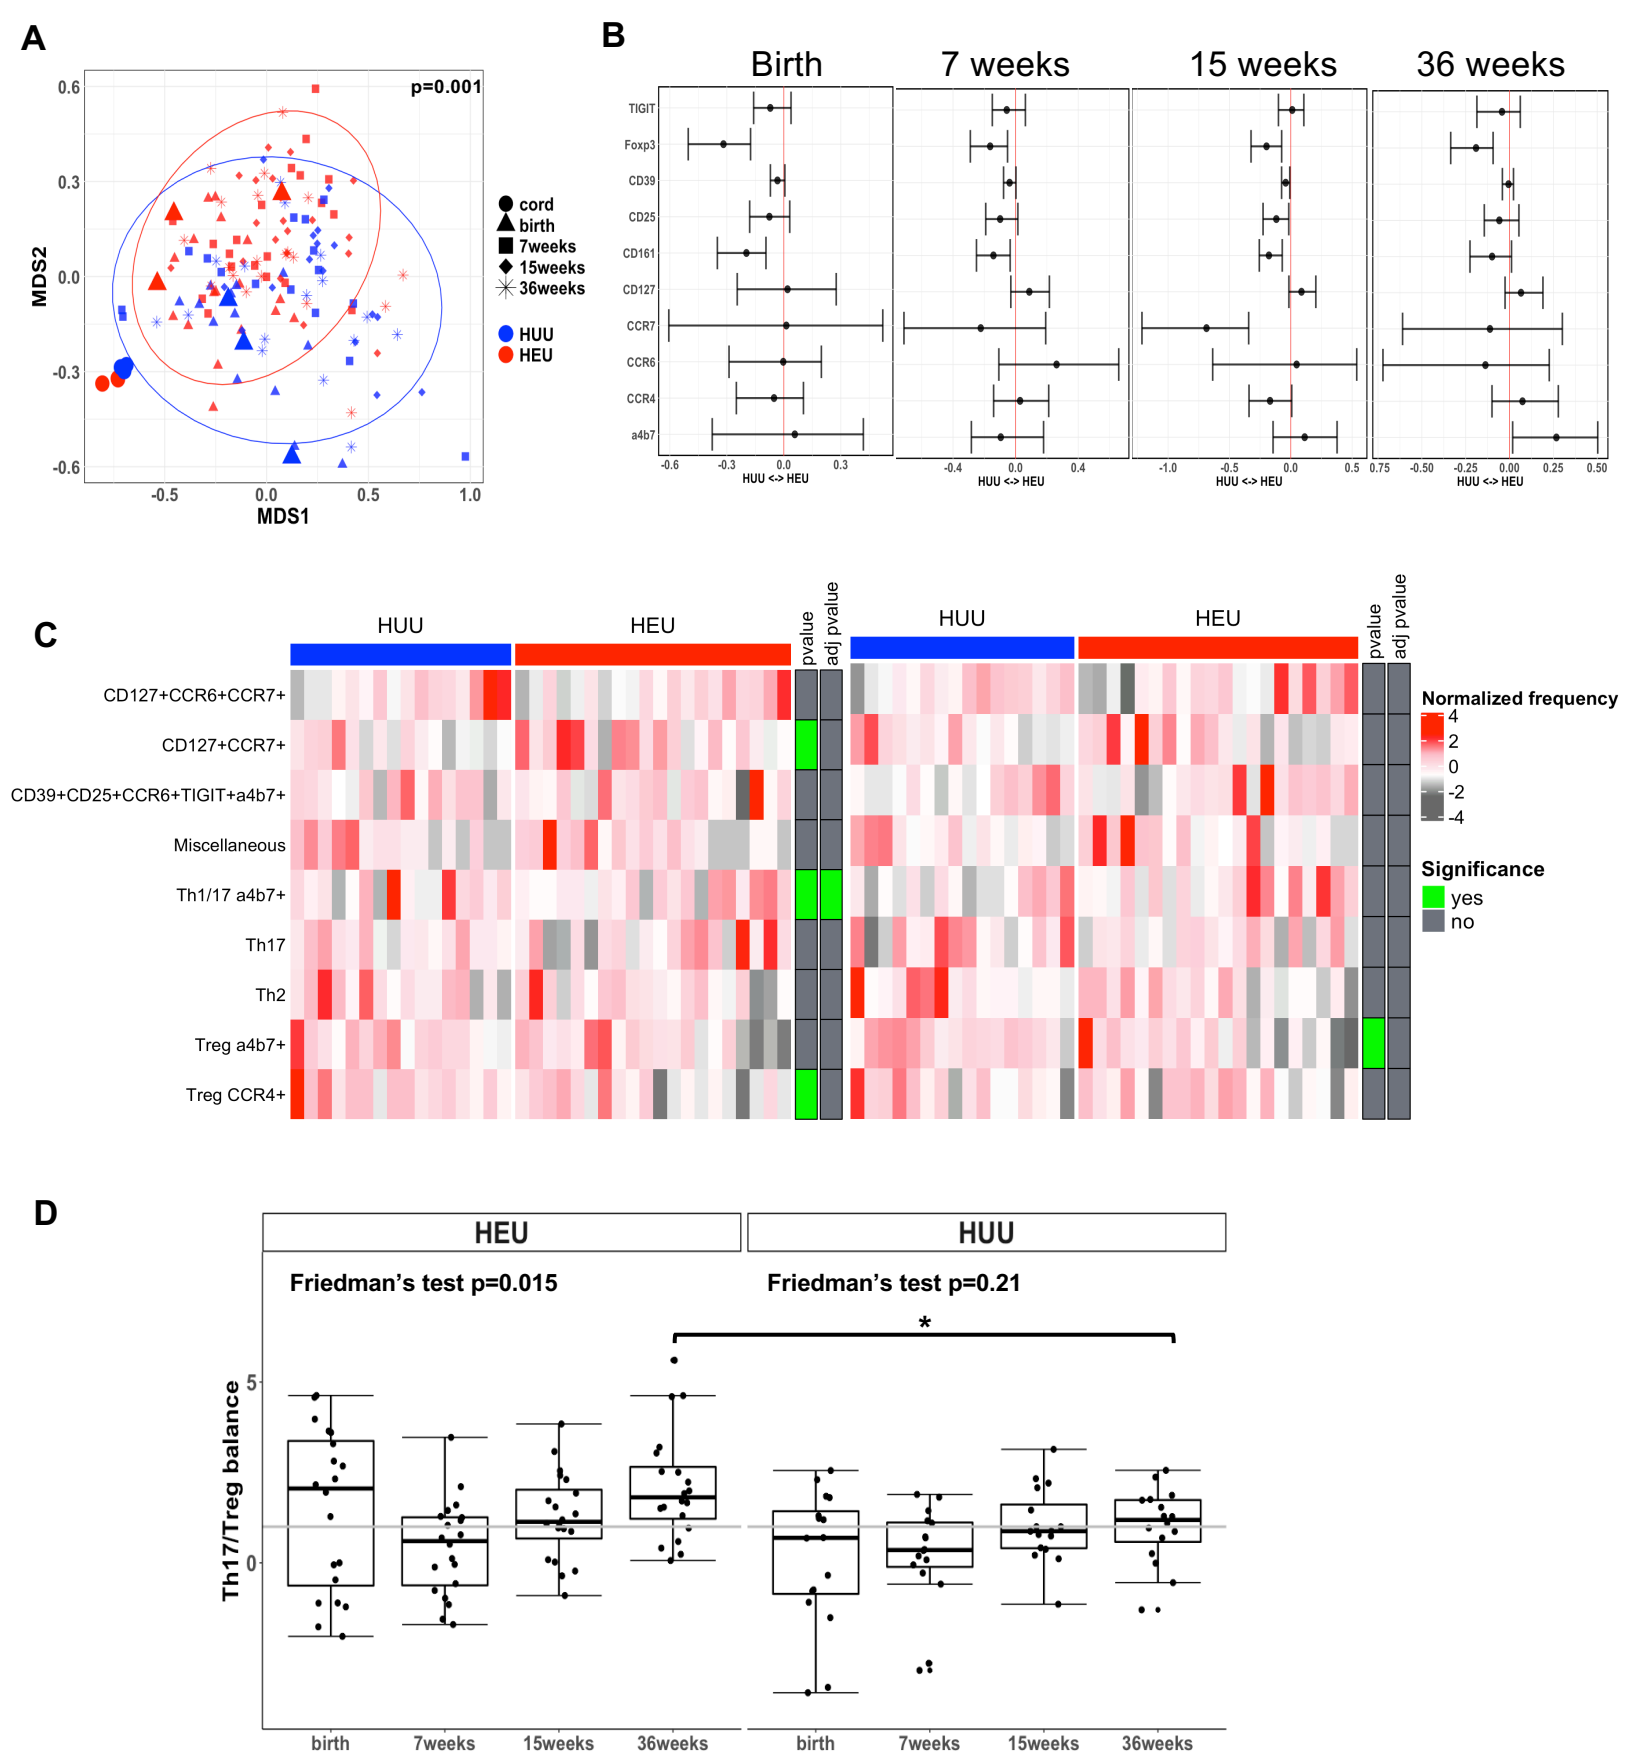

**Figure 3** In utero HIV exposure disrupts Th17/Treg ratio during infancy A) Multidimensional scaling (MDS) showing dissimilarity of CD4<sup>+</sup> between HIV-exposed uninfected infants (iHEU) and HIV-unexposed uninfected infants (iHUU). B) Generalized linear mixed model comparing CD4 marker expression between iHEU and iHUU. C) Differential abundance of CD4 cell clusters in iHEU and iHUU at birth and week 36. D) Log<sub>2</sub> Th17/Treg ratio.

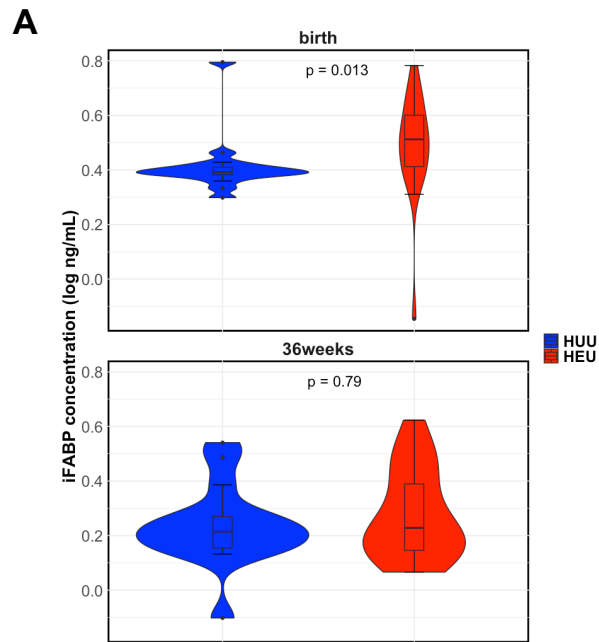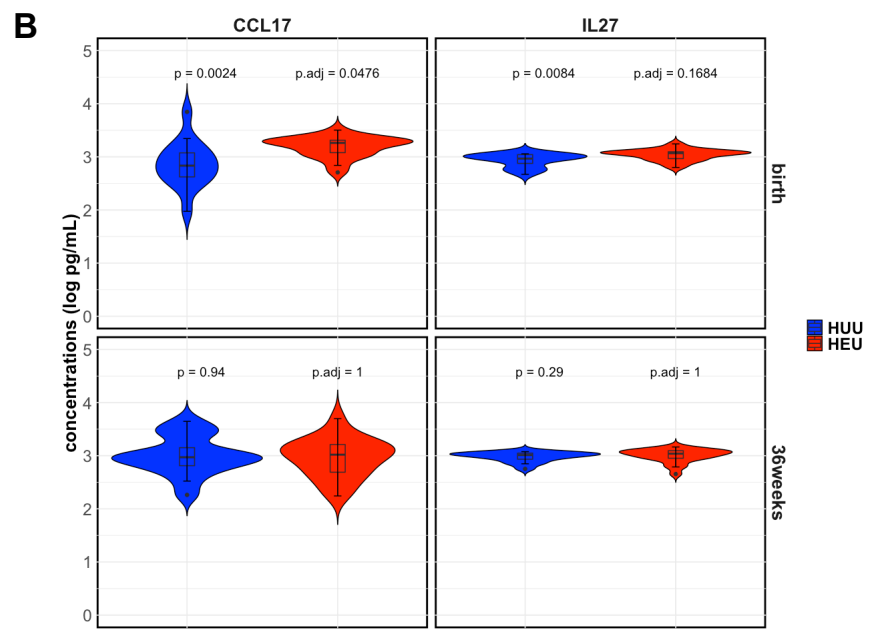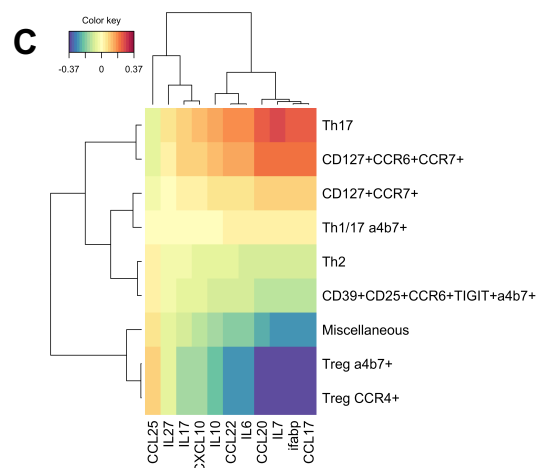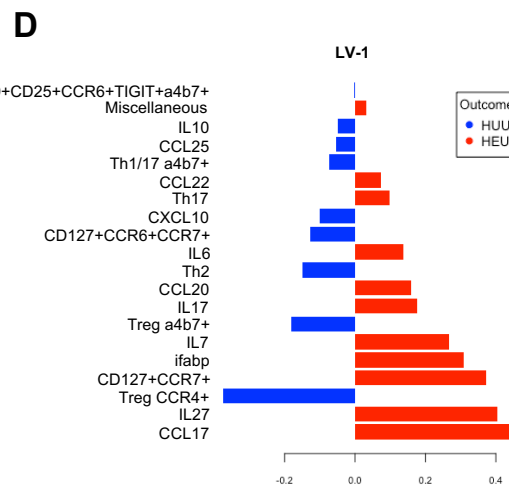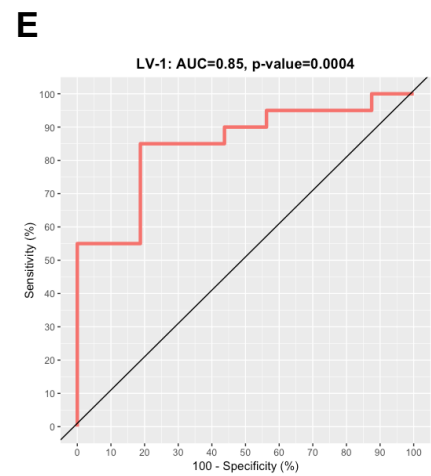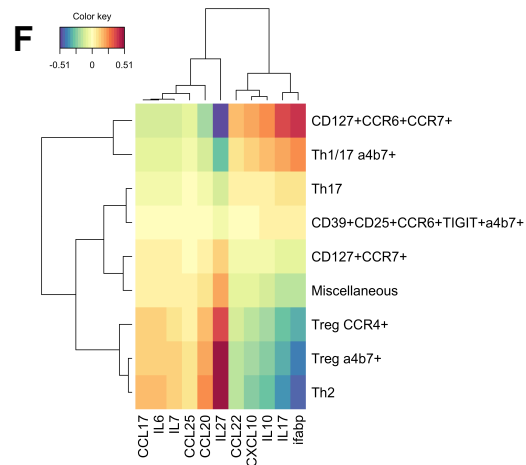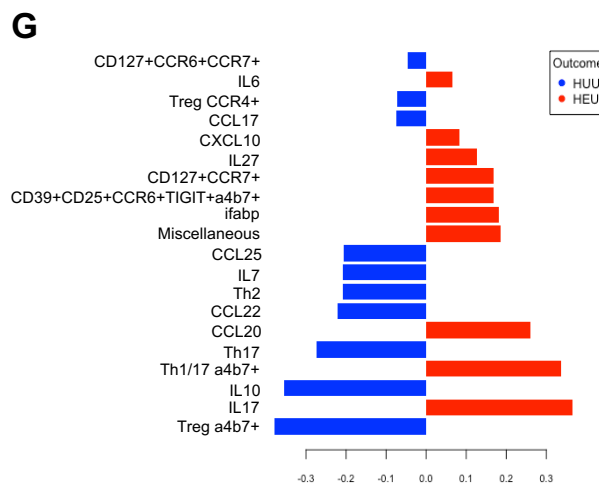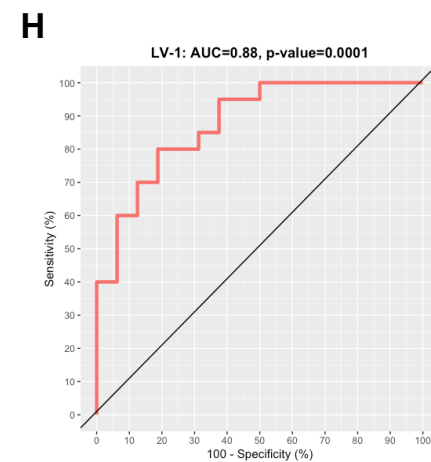

**Figure 4** Gut epithelial integrity and proinflammatory and regulatory milieu associated with Th17 and Treg cells. A) Comparing intestinal fatty acid binding protein (iFABP) concentration between HIV-unexposed uninfected infants (iHUU) and HIV-exposed uninfected infants (iHEU). B) Chemokine and cytokine concentrations in iHUU and iHEU at birth and 36 weeks. C) Cluster image map showing RV correlation of CD4 clusters with iFABP, chemokine and cytokine concentrations. D) Sparse PLS discriminant analysis (sPLS-DA) between HUU and HEU using CD4 clusters and chemokine data set E) ROC-curve analysis of LV-1 loadings at birth. F) Cluster image map of CD4 clusters and iFABP, chemokine and cytokine concentrations. G) sPLS-DA H) ROC-curve analysis of LV-1 loadings at week 36.
