# Supplementary material for: Stereotypic expansion of Tregulatory and Th17 cells during infancy is disrupted by HIV exposure and gut epithelial damage
Source: bioRxiv or medRxiv preprint supplement (doi:10.1101/2021.05.03.442468), 2021-09-15
Supplement: Supplementary file [file media-1.pdf]

## Supplementary information

### Table Legends

**Table S1** Flow cytometry antibody panel used to surface and intracellular stain infant whole blood to characterize T cells.

**Table S2** Demographic characteristic of HIV infected-exposed and HIV uninfected-unexposed mother-infant pairs

### Figure Legends

**Figure S1** Flow cytometry gating strategy to identify T regulatory and Th17 cells.

**Figure S2** Ontological changes of CD4+ cells in HIV-exposed uninfected (HEU) and HIV-unexposed uninfected (HUU) infants. A) Th17 and B) Treg cells.

**Figure S3** Plasma analytes measure in HIV-exposed uninfected infants (iHEU) and HIV-unexposed uninfected infants (iHUU). A) Comparisons of iFABP concentrations between iHEU and iHUU measured at 7 and 15 weeks. B) Chemokine and cytokine concentrations measured at birth and 36 weeks of age.

**Figure S4** HIV exposure alters transcriptomic profile of gut homing Treg cells. A) Flow plot showing sorting of  $\alpha 4\beta 7^-$  and  $\alpha 4\beta 7^+$  Treg cells. B) NMDS plots showing Bray Curtis distances between infant samples.

Table S1 Flow cytometry antibody panel used to surface and intracellular stain infant whole blood to characterize T cells.

| <b>Antibody</b>         | <b>Clone</b> | <b>Supplier</b>   |
|-------------------------|--------------|-------------------|
| CD3 Apc-Cy7             | UCHTI        | Biolegend         |
| CD4 AlexaFluor 700      | SK3          | Biolegend         |
| CD8 BV570               | RPA-T8       | Biolegend         |
| CD127 PE-CF594          | hIL-7R-M21   | BD                |
| CD25 PE-Cy7             | 2A3          | BD                |
| Foxp3 AlexaFluor 647    | 2594/C7      | BD                |
| CD39 BV786              | Tu66         | BD                |
| TIGIT FITC              | MBSA43       | eBioscience       |
| CCR7 PerCP-Cy5.5        | G043H7       | Biolegend         |
| CCR6 BV711              | G034E3       | eBioscience       |
| CCR4 BV605              | L291H4       | Biolegend         |
| CD161 PE-Cy5            | DX12         | BD                |
| $\alpha$ 4 $\beta$ 7 PE | A4B7R1       | NIH AIDS reagents |
| FACS sorting            |              |                   |
| CD3 FITC                | OKT3         | Biolegend         |

Table S2 Demographic characteristic of HIV infected-exposed and HIV uninfected-unexposed mother-infant pairs

| <b>Demographics</b>                            | <b>HUU (n=16)</b> | <b>HEU (n=20)</b>       | <b>P value</b> |
|------------------------------------------------|-------------------|-------------------------|----------------|
| Median maternal age at delivery, years (range) | 26 (19-36)        | 27 (19-39)              | 0.49           |
| Median gestational age, weeks (range)          | 39 (37-41)        | 39 (37-41)              | 0.89           |
| Median maternal CD4 count cells/ $\mu$ L (IQR) | -                 | 429.5<br>(344.5-516.50) |                |
| Initiating ART, n (%)                          |                   | 10 (50)                 |                |
| <b>Infant</b>                                  |                   |                         |                |
| Median birth weight, kg (IQR)                  | 3.0 (2.9-3.3)     | 3.3 (2.9-3.5)           | 0.31           |
| Gender, female (%)                             | 9 (56.3)          | 11 (55.0%)              | 0.94           |
| Exclusively breastfeeding                      |                   |                         |                |
| 7 weeks, n (%)                                 | 9 (56.3)          | 10 (50.0)               |                |
| 15 weeks, n (%)                                | 6 (37.5)          | 6 (30.0)                |                |
| 36 weeks, n (%)                                | 0 (0.0)           | 0 (0.0)                 |                |

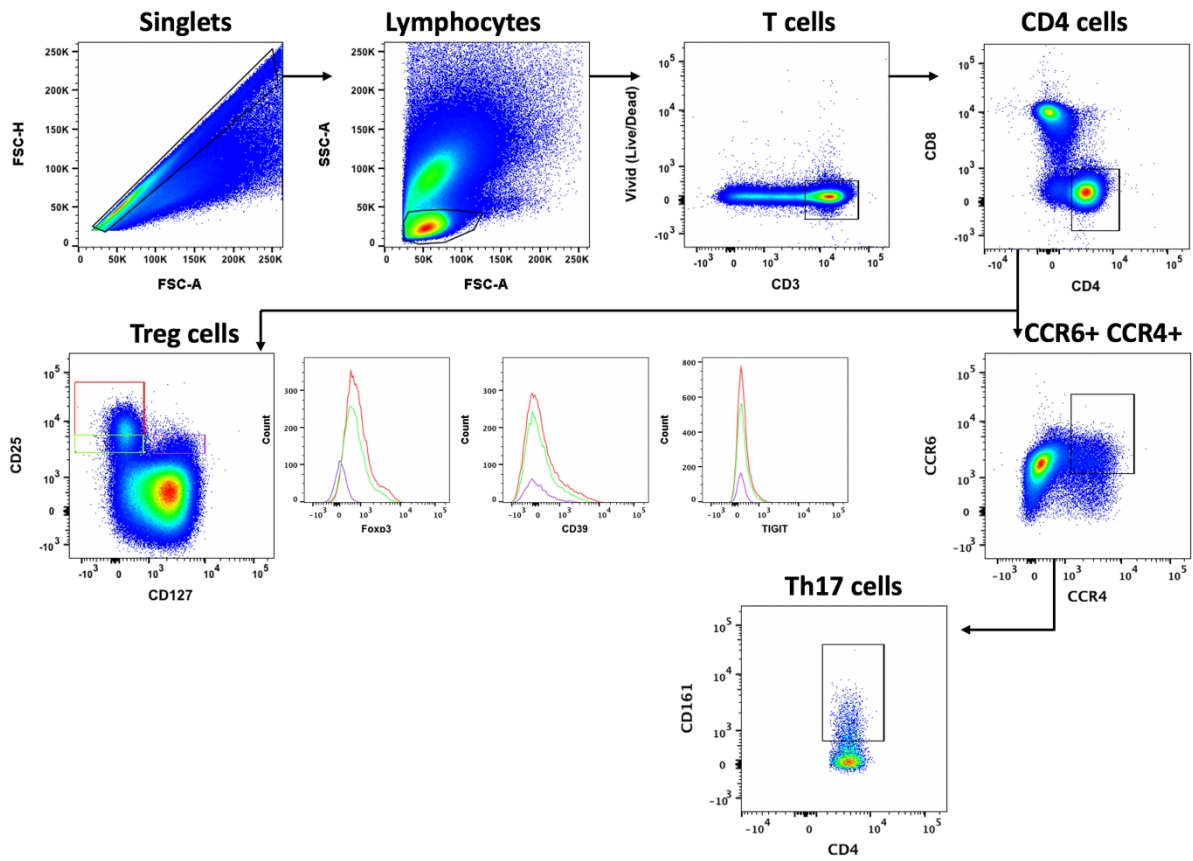

Figure S1 Flow cytometry gating strategy to identify T regulatory and Th17 cells.

**A**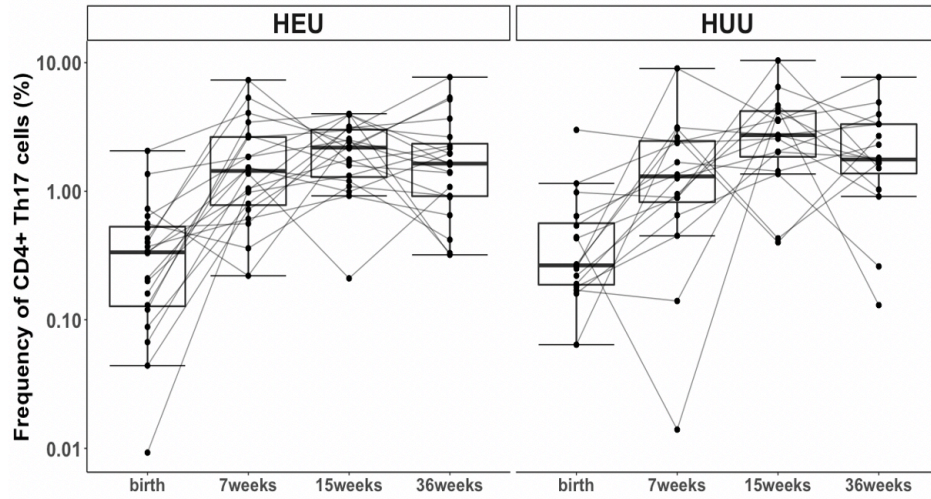**B**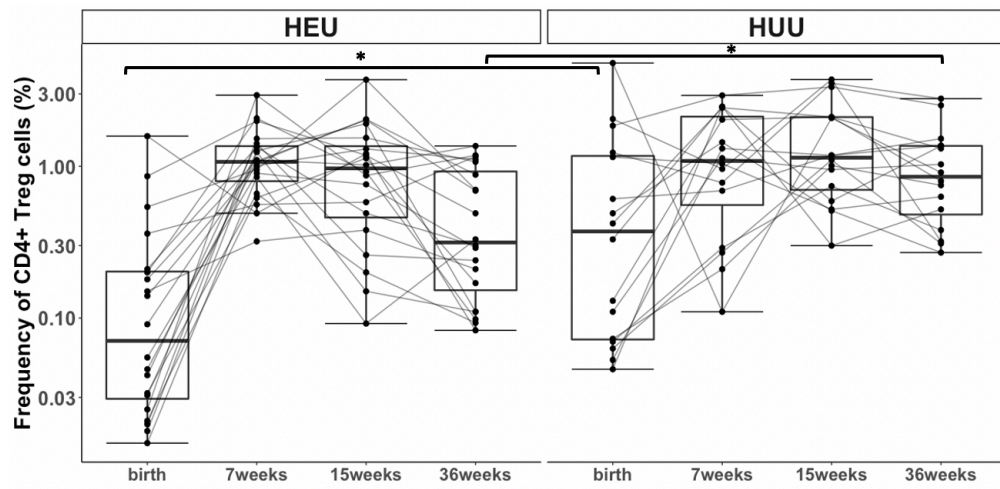

Figure S2 Ontological changes of CD4+ cells in HIV-exposed uninfected (HEU) and HIV-unexposed uninfected (HUU) infants. A) Th17 and B) Treg cells.

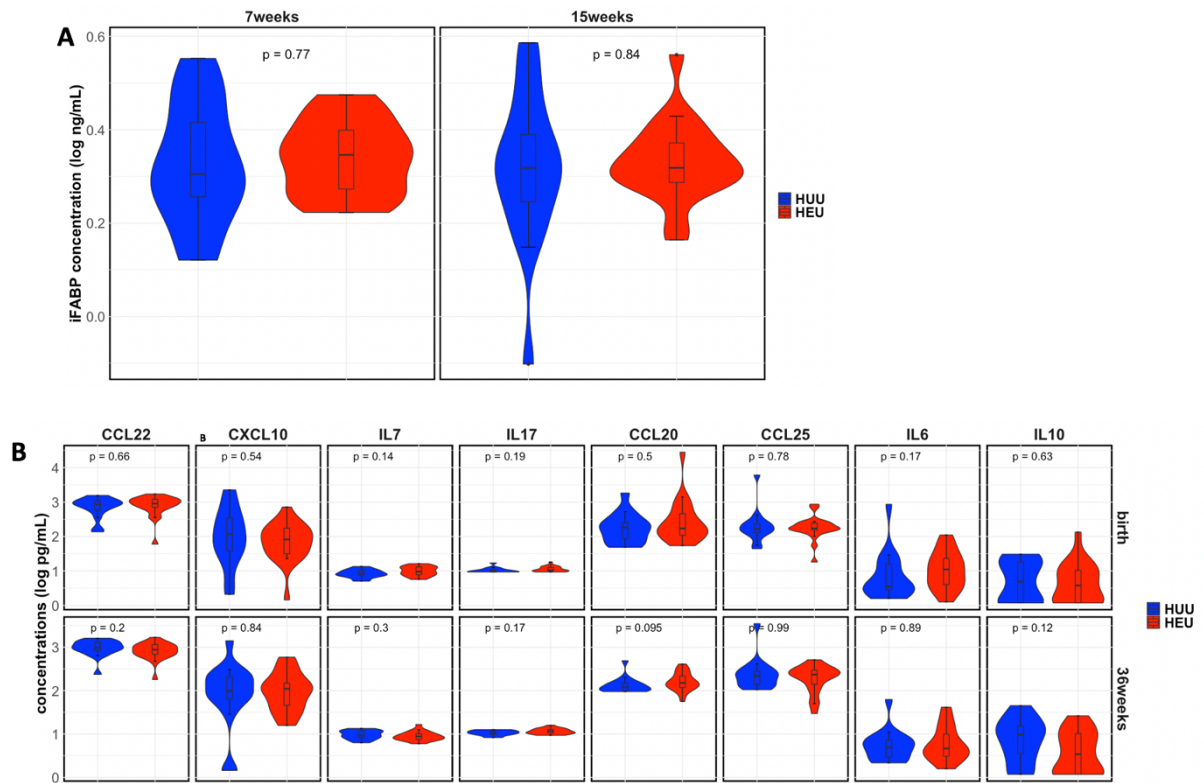

Figure S3 Plasma analytes measure in HIV-exposed uninfected infants (iHEU) and HIV-unexposed uninfected infants (iHUU). A) Comparisons of iFABP concentrations between iHEU and iHUU measured at 7 and 15 weeks. B) Chemokine and cytokine concentrations measured at birth and 36 weeks of age.

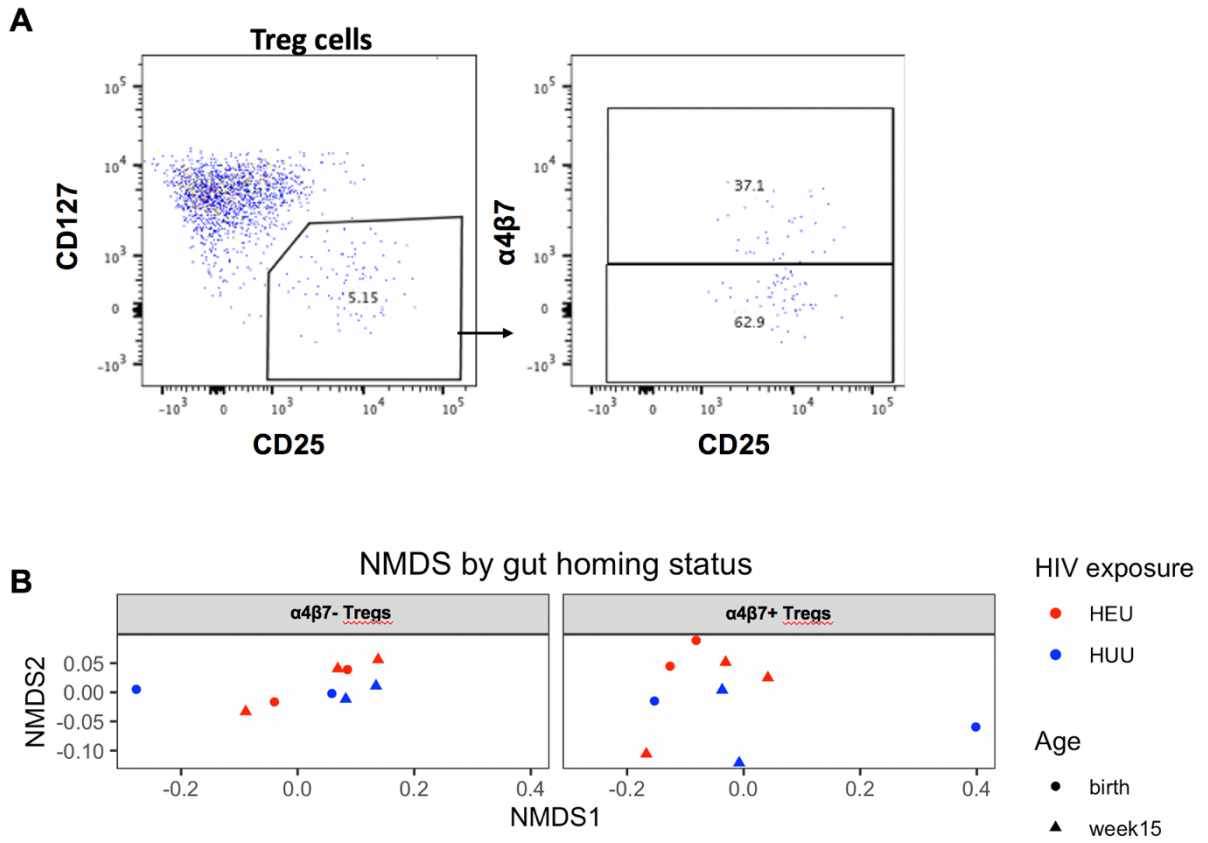

Figure S4 HIV exposure alters transcriptomic profile of gut homing Treg cells. A) Flow plot showing sorting of  $\alpha 4\beta 7^-$  and  $\alpha 4\beta 7^+$  Treg cells. B) NMDS plots showing Bray Curtis distances between infant samples.
